# Supplementary material for: UHPLC-MS metabolome based classification of umbelliferous fruit taxa: a prospect for phyto-equivalency of its different accessions and in response to roasting
Source: Royal Society of Chemistry journal article supplement (doi:10.1039/c9ra07841j), 2019-12-23
Supplement: c9ra07841j1.pdf [file c9ra07841j1.pdf]

**Supplementary file**

**UHPLC-MS metabolome based classification of umbelliferous fruit taxa: A prospect for phyto-equivalency of its different accessions and in response to roasting**

**Ahmed Serag <sup>a</sup>, Mostafa H. Baky <sup>b</sup>, Stefanie Döll <sup>c</sup>, Mohamed A. Farag <sup>d,e\*</sup>**

<sup>a</sup> Pharmaceutical Analytical Chemistry Department, Faculty of Pharmacy, Al-Azhar University, Cairo, 11751, Egypt.

<sup>b</sup> Pharmacognosy Department, Faculty of Pharmacy, Egyptian Russian University, Cairo, 11829, Egypt.

<sup>c</sup> Department of Stress and Developmental Biology, Leibniz Institute of Plant Biochemistry, Weinberg 3, D-06120 Halle (Saale), Germany.

<sup>d</sup> Pharmacognosy Department, Faculty of Pharmacy, Cairo University, Cairo, 11562, Egypt

<sup>e</sup> Chemistry Department, School of Sciences & Engineering, The American University in Cairo, New Cairo, Egypt

\*Corresponding author email address: [Mohamed.farag@pharma.cu.edu.eg](mailto:Mohamed.farag@pharma.cu.edu.eg) (M.A. Farag)

## Suppl. Code S1

**R script used for extracting the UHPLC-MS features of the examined umbelliferous fruits**

**### loading xcms library####**

```
library(xcms)
```

**### Setting working directory and assigning the UHPLC-MS files #####**

```
setwd("F:\\umbelliferae ") ### for Windows
```

```
lpath<-"."
```

```
files <- list.files(lpath, full.names = T, pattern = ". mzXML ", recursive = T)
```

**####Peak detection of the chromatographic features in each sample using “centwave”**

**algorithm#####**

```
xset <- xcmsSet(files=files, method='centWave', ppm=25, peakwidth=c(5,12), snthr=3,
```

```
verbose.columns=F, scanrange=c(100,1800), prefilter=c(3,500),nSlaves=10)
```

**####Grouping the peaks across all the samples#####**

```
xset_group1 <- group(xset, minfrac = 0.5, bw = 5, mzwid = 1, max = 50)
```

**####Retention time alignment#####**

```
xset_retcor1 <- retcor(xset_group1, plottype="mdevden", span = 1, missing = 1, extra = 1)
```

**####Regrouping after alignment#####**

```
xset_group2 <- group(xset_retcor1, minfrac = 0.5, bw=2, mzwid=0.05)
```

**####Filling the missing data using the raw data files#####**

```
xset_filled <- fillPeaks(xset_group2)
```

**####Generating the final raw data matrix of the detected EICs#####**

```
values <- groupval(xset_filled, value="into")
```

**####Saving the matrix in a csv file for further processing#####**

```
write.csv(values, file="umbelliferae_neg_minfrac0.5.csv")
```

- 1 **Suppl. Table S1.** Metabolites identified in methanol extracts of investigated umbelliferous fruits *via* UHPLC-PDA-ESI-QToF/MS in  
 2 negative and positive ionization modes. Confidence levels of annotation are reported according to the guidelines of the Metabolomics  
 3 Society and coded as follow: 1. Match to reference standard or full 2D structure elucidation. 2. Probable structure based on MS/MS  
 4 information and data base search. 3. Possible structure or class or isomers. 4. Unknown.

| Peak No. | RT (sec) | UV (nm) | Mol. ion m/z ( $\pm$ ) | Molecular formula                                            | error (ppm) | Name                                       | Class               | MS/MS              | Confidence level of annotation |
|----------|----------|---------|------------------------|--------------------------------------------------------------|-------------|--------------------------------------------|---------------------|--------------------|--------------------------------|
| 1        | 29.1     | 255     | 377.0853               | C <sub>18</sub> H <sub>17</sub> O <sub>9</sub> <sup>-</sup>  | 6.8         | Unknown lignan                             | Lignan              | 341, 195           | 3                              |
| 2        | 31.6     | 257     | 278.1236               | C <sub>11</sub> H <sub>20</sub> NO <sub>7</sub> <sup>+</sup> | -0.8        | <i>N</i> -rhamnosyl proline                | Acylated amino acid | 260, 242           | 2                              |
| 3        | 39.8     | 257     | 280.1394               | C <sub>11</sub> H <sub>22</sub> NO <sub>7</sub> <sup>+</sup> | -1.1        | Fructosyl- <i>O</i> -valine                | Acylated amino acid | 262,244, 216,118   | 2                              |
| 4        | 48.2     | 254     | 294.1553               | C <sub>12</sub> H <sub>24</sub> NO <sub>7</sub> <sup>+</sup> | -1.9        | Isoleucyl- <i>O</i> -hexose                | Acylated amino acid | 276, 258, 230, 132 | 3                              |
| 5        | 58.8     | 252     | 205.0336               | C <sub>7</sub> H <sub>9</sub> O <sub>7</sub> <sup>-</sup>    | 8.7         | Homo(iso)citric acid                       | Organic acid        | 111                | 2                              |
| 6        | 66.7     | 251     | 328.1399               | C <sub>15</sub> H <sub>22</sub> NO <sub>7</sub> <sup>+</sup> | -2.4        | Fructosyl- <i>O</i> -phenylalanine         | Acylated amino acid | 310, 292, 264, 166 | 2                              |
| 7        | 98.5     | nd      | 315.0715               | C <sub>13</sub> H <sub>15</sub> O <sub>9</sub> <sup>-</sup>  | 2           | Di-hydroxybenzoic acid- <i>O</i> -hexoside | Phenolic acid       | 153, 109,108       | 3                              |
| 8        | 106.2    | 254     | 329.0877               | C <sub>14</sub> H <sub>17</sub> O <sub>9</sub> <sup>-</sup>  | 0.2         | Vanillic acid- <i>O</i> -hexoside          | Phenolic acid       | 167,152, 123,108   | 3                              |

|    |        |     |          |                         |      |                                                   |                      |                             |   |
|----|--------|-----|----------|-------------------------|------|---------------------------------------------------|----------------------|-----------------------------|---|
| 9  | 109.1  | 250 | 431.1185 | $C_{18}H_{23}O_{12}^-$  | 2.3  | Unknown                                           | Unknown              | 231, 216, 128, 192, 137, 93 | 4 |
| 10 | 119.1  | nd  | 347.1713 | $C_{16}H_{27}O_8^-$     | -0.5 | p-Menth-ene-triol- <i>O</i> -hexoside             | Terpene              | ----                        | 3 |
| 11 | 120.45 | 323 | 353.0878 | $C_{16}H_{17}O_9^-$     | 0.2  | <i>O</i> -caffeoyl quinic acid (Chlorogenic acid) | Phenolic acid        | 315, 299, 277, 191          | 1 |
| 12 | 139.7  | nd  | 359.0973 | $C_{15}H_{19}O_{10}^-$  | 3    | Syringic acid- <i>O</i> -hexoside                 | Phenolic acid        | 197, 182, 153               | 3 |
| 13 | 142.6  | nd  | 380.1547 | $C_{15}H_{26}NO_{10}^-$ | 3.9  | Pantothenic acid- <i>O</i> -hexoside              | Nitrogenous compound | 200, 146                    | 3 |
| 14 | 149    | nd  | 341.0894 | $C_{15}H_{17}O_9^-$     | -4.8 | Caffeic acid- <i>O</i> -hexoside                  | Phenolic acid        | 179, 135                    | 3 |
| 15 | 153.3  | 287 | 205.0954 | $C_{11}H_{13}N_2O_2^+$  | 8.4  | Tryptophan                                        | Amino acid           | 188, 146                    | 1 |
| 16 | 159.4  | nd  | 325.0944 | $C_{15}H_{17}O_8^-$     | -4.6 | Coumaric acid- <i>O</i> -hexoside                 | Phenolic acid        | 163, 119                    | 3 |
| 17 | 165.1  | nd  | 517.1538 | $C_{22}H_{29}O_{14}^-$  | 4.7  | Feruloyl- <i>O</i> -dihexoside                    | Phenolic acid        | 193                         | 3 |
| 18 | 166.6  | 255 | 339.0718 | $C_{15}H_{15}O_9^-$     | 1.1  | Esculetin- <i>O</i> -glucoside (Esculin)          | Coumarin             | 177                         | 1 |
| 19 | 173.2  | 319 | 299.0771 | $C_{13}H_{15}O_8^-$     | 0.4  | Hydroxybenzoic                                    | Phenolic acid        | 137, 93                     | 2 |

|    |       |       |          |                                                              |      |                                          |               |                        |     |
|----|-------|-------|----------|--------------------------------------------------------------|------|------------------------------------------|---------------|------------------------|-----|
|    |       |       |          |                                                              |      | acid- <i>O</i> -hexoside                 |               |                        |     |
| 20 | 179.2 | 323   | 353.0881 | C <sub>16</sub> H <sub>17</sub> O <sub>9</sub> <sup>-</sup>  | -0.9 | <i>O</i> -Caffeoyl quinic acid isomer    | Phenolic acid | 191                    | 3   |
| 21 | 181.4 | 290   | 355.1023 | C <sub>16</sub> H <sub>19</sub> O <sub>9</sub> <sup>-</sup>  | 3.1  | Dihydrocaffeoyl-quinic acid              | Phenolic acid | 191                    | 2   |
| 22 | 192   | 264   | 325.0929 | C <sub>15</sub> H <sub>17</sub> O <sub>8</sub> <sup>-</sup>  | -0.1 | Coumaric acid- <i>O</i> -hexoside isomer | Phenolic acid | 163, 119               | 3   |
| 23 | 193   | 264   | 417.1388 | C <sub>18</sub> H <sub>25</sub> O <sub>11</sub> <sup>-</sup> | 3.4  | Sinapoyl alcohol derivative              | Phenolic acid | 209, 194               | 3   |
| 24 | 194.4 | nd    | 357.1183 | C <sub>16</sub> H <sub>21</sub> O <sub>9</sub> <sup>-</sup>  | 2.1  | Dihydroferuloyl- <i>O</i> -hexoside      | Phenolic acid | 195                    | 3   |
| 25 | 194.5 | 255   | 425.165  | C <sub>17</sub> H <sub>29</sub> O <sub>12</sub> <sup>-</sup> | 3.4  | Unknown                                  | Unknown       | 353, 246, 191, 163     | 4   |
| 26 | 198.1 | 323   | 353.0879 | C <sub>16</sub> H <sub>17</sub> O <sub>9</sub> <sup>-</sup>  | -0.4 | <i>O</i> -caffeoyl quinic acid isomer    | Phenolic acid | 191                    | 3   |
| 27 | 201.2 | 290.5 | 475.1457 | C <sub>20</sub> H <sub>27</sub> O <sub>13</sub> <sup>-</sup> | 0.4  | Unknown phenolic acid                    | Phenolic acid | 279, 191, 163, 113, 77 | 3-4 |
| 28 | 204   | nd    | 503.1776 | C <sub>22</sub> H <sub>31</sub> O <sub>13</sub> <sup>-</sup> | -1.1 | Sinapyl- <i>O</i> -pentosyl hexoside     | Phenolic acid | 173, 129, 113          | 3   |
| 29 | 211.2 | nd    | 355.1012 | C <sub>16</sub> H <sub>19</sub> O <sub>9</sub> <sup>-</sup>  | 6.2  | Feruloyl- <i>O</i> -hexoside             | Phenolic acid | 193, 134               | 3   |
| 30 | 215   | nd    | 379.0692 | C <sub>17</sub> H <sub>15</sub> O <sub>10</sub> <sup>-</sup> | -5.7 | Unknown                                  | Unknown       | 241,97                 | 4   |
| 31 | 215.5 | nd    | 455.1173 | C <sub>20</sub> H <sub>23</sub> O <sub>12</sub> <sup>-</sup> | 4.7  | Hydroxycoumarin- <i>O</i> -pentosyl      | Coumarin      | 249, 234, 205,190,175  | 3   |

|    |       |         |          |                        |      |                                                       |                     |                    |     |
|----|-------|---------|----------|------------------------|------|-------------------------------------------------------|---------------------|--------------------|-----|
|    |       |         |          |                        |      | hexoside                                              |                     |                    |     |
| 32 | 215.7 | nd      | 371.0969 | $C_{16}H_{19}O_{10}^-$ | 3.9  | Hydroxyferuloyl- <i>O</i> -hexoside                   | Phenolic acid       | 209, 135           | 3   |
| 33 | 215.7 | nd      | 507.2065 | $C_{22}H_{35}O_{13}^-$ | 3.5  | Unknown                                               | Unknown             | 361, 199, 113      | 4   |
| 34 | 217.2 | nd      | 483.2081 | $C_{20}H_{35}O_{13}^-$ | 0.4  | Unknown                                               | Unknown             | 307, 113           | 3/4 |
| 35 | 221.6 | nd      | 505.1922 | $C_{22}H_{33}O_{13}^-$ | 0.8  | Dihydrosinapyl- <i>O</i> -pentosyl hexoside           | Phenolic acid       | 173, 113           | 3   |
| 36 | 223.3 | shd 300 | 337.0934 | $C_{16}H_{17}O_8^-$    | -1.4 | <i>O</i> -Coumaroylquinic acid                        | Phenolic acid       | 191, 163           | 2   |
| 37 | 224.2 | nd      | 385.1166 | $C_{17}H_{21}O_{10}^-$ | -6.7 | Sinapic acid- <i>O</i> -hexoside                      | Phenolic acid       | 223, 208, 193, 134 | 2/3 |
| 38 | 224.7 | 271,330 | 593.1514 | $C_{27}H_{29}O_{15}^-$ | -0.4 | Apigenin di- <i>C</i> -hexoside                       | <i>C</i> -flavonoid | 473, 413, 383, 353 | 2/3 |
| 39 | 228.9 | nd      | 433.2079 | $C_{20}H_{33}O_{10}^-$ | 0.7  | Unknown                                               | Unknown             | 328, 268, 189, 264 | 4   |
| 40 | 229.8 | nd      | 411.1318 | $C_{19}H_{23}O_{10}^-$ | -5.3 | Unknown                                               | Unknown             | 257, 241, 97       | 3   |
| 41 | 231   | nd      | 509.2212 | $C_{22}H_{37}O_{13}^-$ | 5.5  | Hydroxy-dimethyl-octenoic acid-di- <i>O</i> -hexoside | Fatty acid          | 441, 113           | 3   |
| 42 | 235   | nd      | 341.1259 | $C_{16}H_{21}O_8^-$    | -4.9 | Cuminoid C                                            | Terpene             | 161,119            | 2   |

|    |       |          |          |                        |      |                                                         |                     |                    |   |
|----|-------|----------|----------|------------------------|------|---------------------------------------------------------|---------------------|--------------------|---|
| 43 | 237.6 | nd       | 371.0973 | $C_{16}H_{19}O_{10}^-$ | 2.9  | Feruloylgluconic acid                                   | Phenolic acid       | 249,121            | 2 |
| 44 | 238.1 | nd       | 423.0958 | $C_{19}H_{19}O_{11}^-$ | -5.9 | Unknown                                                 | Unknown             | 241, 97            | 4 |
| 45 | 239.7 | 316      | 413.1445 | $C_{19}H_{25}O_{10}^-$ | 1.9  | Unknown phenolic acid                                   | Phenolic acid       | 241, 97            | 3 |
| 46 | 240.5 | 270, 336 | 367.1027 | $C_{17}H_{19}O_9^-$    | 1.9  | <i>O</i> -feruloyl quinic acid                          | Phenolic acid       | 275, 191           | 2 |
| 47 | 242.1 | nd       | 343.1406 | $C_{16}H_{23}O_8^-$    | -2.1 | Cuminoid D                                              | Terpene             | 163                | 2 |
| 48 | 242.4 | nd       | 387.1329 | $C_{17}H_{23}O_{10}^-$ | -8.5 | Unknown feruloyl derivative                             | Phenolic acid       | 191                | 3 |
| 49 | 243.1 | nd       | 361.1503 | $C_{16}H_{25}O_9^-$    | 0.2  | Dihydroxy-dimethyl-octadienoic acid- <i>O</i> -hexoside | Fatty acid          | 199, 155           | 3 |
| 50 | 243.1 | 269, 338 | 579.1327 | $C_{26}H_{27}O_{15}^-$ | 5    | Luteolin-6- <i>C</i> -hexosyl-8- <i>C</i> -pentoside    | <i>C</i> -flavonoid | 459, 429, 357, 298 | 3 |
| 51 | 248.3 | 345      | 447.0947 | $C_{21}H_{19}O_{11}^-$ | -3.2 | Luteolin- <i>C</i> -hexoside                            | <i>C</i> -flavonoid | 357, 327           | 3 |
| 52 | 250.6 | nd       | 249.119  | $C_{32}H_{34}O_5^+$    | 3.1  | Unknown                                                 | Unknown             | 227, 205, 183, 161 | 4 |
| 53 | 254.2 | 326      | 623.1262 | $C_{27}H_{27}O_{17}^-$ | -1.4 | Luteolin- <i>O</i> -hexosyl                             | <i>O</i> -flavonoid | 447, 285           | 3 |



|    |       |          |          |                        |      |                                                                       |                     |                    |   |
|----|-------|----------|----------|------------------------|------|-----------------------------------------------------------------------|---------------------|--------------------|---|
|    |       |          |          |                        |      | hexauronide                                                           |                     |                    |   |
| 54 | 258.7 | 323      | 385.1145 | $C_{17}H_{21}O_{10}^-$ | -1.4 | Sinapic acid- <i>O</i> -hexoside isomer                               | Phenolic acid       | 209, 193, 161, 134 | 3 |
| 55 | 263.7 | 323      | 425.142  | $C_{20}H_{25}O_{10}^-$ | 7.9  | Dihydroxy-methylbutyl-hydroxycoumarin hexoside                        | Coumarin            | 263, 245, 219, 161 | 3 |
| 56 | 268.9 | 320      | 389.1218 | $C_{20}H_{21}O_8^-$    | 6.1  | Polydatin, Piceid, 3,4,5-Trihydroxystilbene-3- $\beta$ -monoglucoside | Stilbene            | 227, 185           | 1 |
| 57 | 270.2 | 322      | 471.1507 | $C_{21}H_{27}O_{12}^-$ | 0.2  | Coumaroyl- <i>O</i> -rutinose                                         | Phenolic acid       | 431, 325, 161, 133 | 3 |
| 58 | 270.3 | 342      | 533.132  | $C_{25}H_{25}O_{13}^-$ | -3.7 | Apigenin di- <i>C</i> -pentoside                                      | <i>C</i> -flavonoid | 473, 443, 383, 353 | 3 |
| 59 | 270.7 | 266,335  | 607.1343 | $C_{27}H_{27}O_{16}^-$ | -6.3 | Apigenin- <i>O</i> -hexosyl hexauronide                               | <i>O</i> -flavonoid | 431, 269           | 3 |
| 60 | 271.3 | 326      | 331.178  | $C_{16}H_{27}O_7^-$    | -5.3 | <i>p</i> -Menth-ene-diol- <i>O</i> -hexoside                          | Terpene             | ----               | 3 |
| 61 | 271.4 | nd       | 609.1427 | $C_{27}H_{29}O_{16}^-$ | 5.5  | Rutin                                                                 | <i>O</i> -flavonoid | 301,300,270,269    | 1 |
| 62 | 272.9 | 270, 238 | 431.0969 | $C_{21}H_{19}O_{10}^-$ | -1.3 | Apigenin- <i>C</i> -                                                  | <i>C</i> -flavonoid | 341, 311, 283,     | 3 |

|    |       |          |          |                        |      |                                            |                               |                                   |   |
|----|-------|----------|----------|------------------------|------|--------------------------------------------|-------------------------------|-----------------------------------|---|
|    |       |          |          |                        |      | hexoside                                   |                               | 269                               |   |
| 63 | 276   | 252, 342 | 637.1439 | $C_{28}H_{29}O_{17}^-$ | -4.5 | Chrysoeriol- <i>O</i> -hexosyl hexauronide | <i>O</i> -flavonoid           | 461, 299, 284                     | 3 |
| 64 | 277.6 | 255, 353 | 477.0668 | $C_{21}H_{17}O_{13}^-$ | 1.4  | Quercetin- <i>O</i> -hexauronide           | <i>O</i> -flavonoid           | 301                               | 3 |
| 65 | 279.1 | 255, 353 | 463.0854 | $C_{21}H_{19}O_{12}^-$ | 6.1  | Quercetin-3-glucoside, Isoquercitrin       | <i>O</i> -flavonoid           | 301, 300, 271                     | 1 |
| 66 | 286.4 | 297      | 264.0875 | $C_{13}H_{14}NO_5^-$   | 0.9  | unknown                                    | Unknown                       | 234, 202                          | 4 |
| 67 | 290   | nd       | 549.0886 | $C_{24}H_{21}O_{15}^-$ | 3.3  | Quercetin- <i>O</i> -hexosyl malonate      | Acylated- <i>O</i> -flavonoid | 300, 271                          | 3 |
| 68 | 291.1 | 264, 339 | 447.0916 | $C_{21}H_{19}O_{11}^-$ | 3.7  | Kampferol- <i>O</i> -hexoside              | <i>O</i> -flavonoid           | 285, 284, 255, 227                | 3 |
| 69 | 292.1 | 320      | 515.1186 | $C_{25}H_{23}O_{12}^-$ | 1.7  | di- <i>O</i> -Caffeoylquinic acid          | Phenolic acid                 | 191, 179, 173, 135                | 2 |
| 70 | 301.2 | 327      | 461.0706 | $C_{21}H_{17}O_{12}^-$ | 4.1  | Luteolin- <i>O</i> -hexauronide            | <i>O</i> -flavonoid           | 285                               | 3 |
| 71 | 301.4 | 327      | 601.1176 | $C_{28}H_{25}O_{15}^-$ | 3.8  | Methoxyoxalyl-dicaffeoylquinic acid        | Phenolic acid                 | 335, 233, 215, 191, 135, 179, 161 | 2 |
| 72 | 303.3 | 267, 330 | 593.1542 | $C_{27}H_{29}O_{15}^-$ | -5.1 | Apigenin- <i>O</i> -dihexoside             | <i>O</i> -flavonoid           | 269                               | 3 |

|    |       |          |          |                        |      |                                                             |                               |                         |     |
|----|-------|----------|----------|------------------------|------|-------------------------------------------------------------|-------------------------------|-------------------------|-----|
| 73 | 305.9 | nd       | 477.1018 | $C_{22}H_{21}O_{12}^-$ | 4.4  | Isorhamnetin- <i>O</i> -hexoside                            | <i>O</i> -flavonoid           | 315, 314, 299, 271      | 3   |
| 74 | 307.9 | nd       | 505.0965 | $C_{23}H_{21}O_{13}^-$ | 4.5  | Quercetin- <i>O</i> -hexosyl acetate                        | Acylated- <i>O</i> -flavonoid | 300, 271                | 3   |
| 75 | 310   | 266, 336 | 431.1001 | $C_{21}H_{19}O_{10}^-$ | -3.9 | Apigenin- <i>O</i> -hexoside                                | <i>O</i> -flavonoid           | 269, 268                | 3   |
| 76 | 310.4 | 288, 320 | 491.082  | $C_{22}H_{19}O_{13}^-$ | 2.3  | Pentahydroxyflavone- <i>O</i> -hexouronic acid methyl ether | <i>O</i> -flavonoid           | 315, 300, 271, 255      | 2   |
| 77 | 311.3 | 266,341  | 533.0936 | $C_{24}H_{21}O_{14}^-$ | 0.2  | Luteolin- <i>O</i> -hexosyl -malonate                       | Acylated- <i>O</i> -flavonoid | 447, 285, 284           | 3   |
| 78 | 314.1 | 320      | 531.1705 | $C_{23}H_{31}O_{14}^-$ | 2.7  | Ferulic acid derivative                                     | Phenolic acid                 | 193                     | 3-4 |
| 79 | 315   | 266343   | 489.1045 | $C_{23}H_{21}O_{12}^-$ | -1.3 | Kaempferol- <i>O</i> -hexosyl-acetate                       | Acylated- <i>O</i> -flavonoid | 285, 284, 237           | 3   |
| 80 | 315.6 | nd       | 489.1016 | $C_{23}H_{21}O_{12}^-$ | 4.5  | Luteolin- <i>O</i> -hexosyl-acetate                         | Acylated- <i>O</i> -flavonoid | 447, 243                | 3   |
| 81 | 315.8 | 273      | 463.1233 | $C_{22}H_{23}O_{11}^+$ | 0.4  | Trihydroxymethoxy flavone hexoside                          | <i>O</i> -flavonoid           | 301                     | 3   |
| 82 | 317   | 268, 339 | 461.1107 | $C_{22}H_{21}O_{11}^-$ | -3.9 | Chryseriol- <i>O</i> -hexoside                              | <i>O</i> -flavonoid           | 446, 299, 298, 284, 283 | 3   |
| 83 | 317   | nd       | 475.2174 | $C_{22}H_{35}O_{11}^-$ | 2.2  | Unknown                                                     | Unknown                       | 353, 273, 189           | 3   |

|    |       |     |          |                        |      |                                                                             |                               |                              |   |
|----|-------|-----|----------|------------------------|------|-----------------------------------------------------------------------------|-------------------------------|------------------------------|---|
| 84 | 317.3 | 277 | 359.0767 | $C_{18}H_{15}O_8^-$    | 1.4  | Rosmarinic acid                                                             | Phenolic acid                 | 197, 161                     | 1 |
| 85 | 320.6 | nd  | 447.0913 | $C_{21}H_{19}O_{11}^-$ | 4.4  | Luteolin- <i>O</i> -hexoside                                                | <i>O</i> -flavonoid           | 285                          | 3 |
| 86 | 321.3 | 324 | 547.1477 | $C_{26}H_{27}O_{13}^-$ | -3.6 | Apigenin- <i>C</i> -hexoside- <i>C</i> -rhamnoside                          | <i>C</i> -flavonoid           | 487, 457, 427, 397, 367      | 3 |
| 87 | 321.4 | nd  | 625.1185 | $C_{30}H_{25}O_{15}^-$ | 2.2  | Quercetin- <i>O</i> -caffeoyl-hexoside                                      | Acylated- <i>O</i> -flavonoid | 463, 300, 161                | 3 |
| 88 | 326.1 | nd  | 477.2345 | $C_{22}H_{37}O_{11}^-$ | -0.7 | Dimethyl-octadienol-di-hexoside                                             | Terpene                       | 301, 113                     | 3 |
| 89 | 326.9 | 296 | 499.1232 | $C_{25}H_{23}O_{11}^-$ | 2.9  | <i>O</i> -(Dihydroxy-cinnamoyl),- <i>O</i> -(hydroxy-cinnamoyl) quinic acid | Phenolic acid                 | 191, 163, 135, 119           | 2 |
| 90 | 328.5 | 280 | 473.1469 | $C_{24}H_{25}O_{10}^-$ | -3.4 | Cuminoid E                                                                  | Chalcone                      | 311, 279, 251, 235           | 2 |
| 91 | 329.5 | nd  | 479.1195 | $C_{22}H_{23}O_{12}^-$ | 2.1  | Pentahydroxyflavanone methyl ether hexoside                                 | <i>O</i> -flavonoid           | 333, 285, 255, 211, 153, 108 | 3 |
| 92 | 330.1 | nd  | 431.1012 | $C_{21}H_{19}O_{10}^-$ | -6.6 | Luteolin- <i>O</i> -rhamnoside                                              | <i>O</i> -flavonoid           | 285                          | 3 |

|     |       |          |          |                                                              |      |                                                                                    |                               |                    |     |
|-----|-------|----------|----------|--------------------------------------------------------------|------|------------------------------------------------------------------------------------|-------------------------------|--------------------|-----|
| 93  | 334.2 | nd       | 529.1351 | C <sub>26</sub> H <sub>25</sub> O <sub>12</sub> <sup>-</sup> | 0.1  | <i>O</i> -caffeoyl- <i>O</i> -feruloylquinic acid                                  | Phenolic acid                 | 191, 179,161       | 2   |
| 94  | 337.6 | nd       | 609.1214 | C <sub>30</sub> H <sub>25</sub> O <sub>14</sub> <sup>-</sup> | 5.9  | Kaempferol-di- <i>O</i> -hexoside                                                  | <i>O</i> -flavonoid           | 447, 285, 161      | 3   |
| 95  | 337.9 | 266, 335 | 517.1028 | C <sub>24</sub> H <sub>21</sub> O <sub>13</sub> <sup>-</sup> | -7.7 | Apigenin- <i>O</i> -hexosyl-malonate                                               | Acylated- <i>O</i> -flavonoid | 431, 269           | 3   |
| 96  | 338.5 | 285      | 473.1095 | C <sub>23</sub> H <sub>21</sub> O <sub>11</sub> <sup>-</sup> | -1.1 | unknown flavonoid                                                                  | Flavonoid aglycone            | 263, 219,110       | 3-4 |
| 97  | 340.4 | 220, 284 | 499.1248 | C <sub>25</sub> H <sub>23</sub> O <sub>11</sub> <sup>-</sup> | -0.4 | <i>O</i> -(Dihydroxy-cinnamoyl),- <i>O</i> -(hydroxy-cinnamoyl) quinic acid isomer | Phenolic acid                 | 191, 163, 119      | 3   |
| 98  | 340.8 | 284      | 841.2511 | C <sub>48</sub> H <sub>41</sub> O <sub>14</sub> <sup>-</sup> | -1.1 | Miyabenol C glucoside                                                              | Stilbene                      | 679, 345           | 2   |
| 99  | 344.5 | 218      | 529.1294 | C <sub>26</sub> H <sub>25</sub> O <sub>12</sub> <sup>-</sup> | 2.7  | <i>O</i> -caffeoyl- <i>O</i> -feruloylquinic acid isomer                           | Phenolic acid                 | 193, 191, 173, 135 | 3   |
| 100 | 352.6 | nd       | 521.1658 | C <sub>25</sub> H <sub>29</sub> O <sub>12</sub> <sup>-</sup> | 1.3  | Unknown caffeoyl derivative                                                        | Phenolic acid                 | 269, 179,135       | 3-4 |
| 101 | 356.6 | 220      | 339.0859 | C <sub>19</sub> H <sub>15</sub> O <sub>6</sub> <sup>-</sup>  | 4.5  | <i>p</i> -Coumaric acid-                                                           | Phenolic acid                 | 307, 263, 235      | 2   |

|     |       |          |          |                                                              |      |                                            |                               |                         |   |
|-----|-------|----------|----------|--------------------------------------------------------------|------|--------------------------------------------|-------------------------------|-------------------------|---|
|     |       |          |          |                                                              |      | <i>O</i> -dihydroxy-cinnamoyl methyl ester |                               |                         |   |
| 102 | 367.1 | nd       | 301.035  | C <sub>15</sub> H <sub>9</sub> O <sub>7</sub> <sup>-</sup>   | 1.2  | Quercetin                                  | Flavonoid aglycone            | 151, 285, 179, 273      | 1 |
| 103 | 367.4 | 220      | 447.2236 | C <sub>21</sub> H <sub>35</sub> O <sub>10</sub> <sup>-</sup> | -2.5 | Dimethyl-octadienol-pentosyl-hexoside      | Terpene                       | 379, 301, 161           | 3 |
| 104 | 370.5 | 268, 349 | 285.0412 | C <sub>15</sub> H <sub>9</sub> O <sub>6</sub> <sup>-</sup>   | -2.5 | Luteolin; 3',4',5,7-Tetrahydroxyflavone    | Flavonoid aglycone            | 285, 199, 151, 217, 241 | 1 |
| 105 | 370.7 | nd       | 623.1371 | C <sub>31</sub> H <sub>27</sub> O <sub>14</sub> <sup>-</sup> | 5.6  | Luteolin- <i>O</i> -feruloyl hexoside      | Acylated- <i>O</i> -flavonoid | 284, 255                | 3 |
| 106 | 375.8 | 337      | 473.1079 | C <sub>23</sub> H <sub>21</sub> O <sub>11</sub> <sup>-</sup> | 2.3  | Apigenin- <i>O</i> -hexosyl acetate        | Acylated- <i>O</i> -flavonoid | 269, 268                | 3 |
| 107 | 394.3 | nd       | 245.0444 | C <sub>13</sub> H <sub>9</sub> O <sub>5</sub> <sup>-</sup>   | 4.5  | Pimpinellin                                | Coumarin                      | 245, 213, 185           | 2 |
| 108 | 396.8 | 220      | 245.0449 | C <sub>13</sub> H <sub>9</sub> O <sub>5</sub> <sup>-</sup>   | 2.7  | Pimpinellin isomer                         | Coumarin                      | 213, 185                | 3 |
| 109 | 397.2 | 220      | 298.1803 | C <sub>19</sub> H <sub>24</sub> NO <sub>2</sub> <sup>+</sup> | -0.6 | Unknown                                    | Unknown                       | 133                     | 4 |
| 110 | 397.3 | nd       | 491.2851 | C <sub>24</sub> H <sub>43</sub> O <sub>10</sub> <sup>-</sup> | 2.3  | Trihydroxy-octadecaenoic acid-hexoside     | Hydroxy fatty acid            | 329, 229, 211           | 3 |
| 111 | 404   | 220, 320 | 453.1329 | C <sub>28</sub> H <sub>21</sub> O <sub>6</sub> <sup>-</sup>  | 3.3  | Trihydroxystilbene                         | Stilbene                      | 345, 225                | 3 |

|     |       |          |          |                     |      |                                 |                    |                         |   |
|-----|-------|----------|----------|---------------------|------|---------------------------------|--------------------|-------------------------|---|
|     |       |          |          |                     |      | dimer                           |                    |                         |   |
| 112 | 405.4 | 220      | 411.2038 | $C_{21}H_{31}O_8^-$ | -3.4 | Unidentified terpene glycoside  | Terpene            | 331, 97                 | 3 |
| 113 | 409.4 | 266, 335 | 269.0467 | $C_{15}H_9O_5^-$    | -4.3 | Apigenin                        | Flavonoid aglycone | 269, 225, 201, 151, 117 | 1 |
| 114 | 410.4 | 220      | 215.1289 | $C_{11}H_{19}O_4^-$ | -0.6 | Unknown                         | Unknown            | 197, 161                | 4 |
| 115 | 413   | 219, 320 | 679.1994 | $C_{42}H_{31}O_9^-$ | -3   | Miyabenol C                     | Stilbene           | 572, 451, 345, 227      | 2 |
| 116 | 414.8 | 220      | 285.0384 | $C_{15}H_9O_6^-$    | 7.3  | Kaempferol                      | Flavonoid aglycone | 229, 211, 199, 187      | 1 |
| 117 | 420.2 | nd       | 327.2181 | $C_{18}H_{31}O_5^-$ | -1.1 | Trihydroxy-octadecadienoic acid | Hydroxy fatty acid | 309, 291, 229, 211      | 3 |
| 118 | 421.2 | 220      | 395.1362 | $C_{19}H_{23}O_9^-$ | -3.7 | unknown                         | Unknown            | 256, 97                 | 4 |
| 119 | 421.9 | nd       | 299.0559 | $C_{16}H_{11}O_6^-$ | 0.7  | Chrysoeriol                     | Flavonoid aglycone | 299, 284                | 2 |
| 120 | 433   | 220      | 301.1071 | $C_{17}H_{17}O_5^-$ | 3.4  | Unknown flavonoid               | Flavonoid aglycone | 285, 264, 230           | 3 |
| 121 | 446.7 | nd       | 329.2321 | $C_{18}H_{33}O_5^-$ | 3.8  | Trihydroxy-octadecaenoic acid   | Hydroxy fatty acid | 311, 293, 229, 211, 171 | 3 |
| 122 | 458.5 | 221      | 331.248  | $C_{18}H_{35}O_5^-$ | 2.9  | Trihydroxy-octadecanoic acid    | Hydroxy fatty acid | 311, 293,               | 3 |
| 123 | 465.6 | 266      | 163.0765 | $C_{10}H_{11}O_2^-$ | -0.5 | Cumic Acid                      | Phenolic acid      | 163, 148, 134,          | 2 |

|     |       |     |          |                        |      |                                 |                    |                         |   |
|-----|-------|-----|----------|------------------------|------|---------------------------------|--------------------|-------------------------|---|
|     |       |     |          |                        |      |                                 |                    | 121                     |   |
| 124 | 474.6 | 221 | 375.1821 | $C_{21}H_{27}O_6^-$    | -2.1 | Unknown                         | Unknown            | 329, 281, 227, 101, 97  | 4 |
| 125 | 479.6 | 221 | 313.1079 | $C_{18}H_{17}O_5^-$    | 0.8  | Unknown                         | Unknown            | 241, 193, 134           | 4 |
| 126 | 479.7 | nd  | 279.0673 | $C_{17}H_{11}O_4^-$    | -3.8 | Unknown flavonoid               | Flavonoid aglycone | 279, 251, 235, 117      | 3 |
| 127 | 480.1 | 221 | 309.2055 | $C_{18}H_{29}O_4^-$    | 5.2  | Dihydroxy-octadecatrienoic acid | Hydroxy fatty acid | 291, 221                | 3 |
| 128 | 494.4 | 221 | 327.2154 | $C_{16}H_{31}O_4^-$    | 7.2  | Dihydroxy-palmitic acid         | Hydroxy fatty acid | 309, 273, 244, 197, 174 | 3 |
| 129 | 495.1 | 221 | 274.274  | $C_{16}H_{36}NO_2^+$   | 0.3  | Amino-hexadecanediol            | Sphingolipid       | 230                     | 3 |
| 130 | 497.1 | nd  | 647.1765 | $C_{34}H_{31}O_{13}^-$ | 0.9  | Unknown                         | Unknown            | 269                     | 4 |
| 131 | 500.5 | 221 | 318.2992 | $C_{18}H_{40}NO_3^+$   | 3.2  | Amino-methyl-heptadecanetriol   | Sphingolipid       | 256                     | 3 |
| 132 | 501.7 | 222 | 307.1907 | $C_{18}H_{27}O_4^-$    | 7    | Unknown oxylipid                | Oxylipid           | 235, 185, 121           | 3 |
| 133 | 513.6 | nd  | 303.1601 | $C_{18}H_{23}O_4^-$    | 0.1  | Unknown                         | Unknown            | 203, 133                | 4 |
| 134 | 515.2 | 222 | 311.2221 | $C_{18}H_{31}O_4^-$    | 2.5  | Dihydroxy-octadecadienoic acid  | Hydroxy fatty acid | 237, 161                | 3 |
| 135 | 518   | nd  | 547.2531 | $C_{29}H_{39}O_{10}^-$ | 3.2  | Unknown steroid                 | Steroid            | 203, 189                | 3 |



|     |       |     |          |                       |      |                             |                    |                       |   |
|-----|-------|-----|----------|-----------------------|------|-----------------------------|--------------------|-----------------------|---|
| 136 | 526   | 221 | 249.1485 | $C_{15}H_{21}O_3^-$   | 5    | Unknown terpene             | Terpene            | 205, 184, 145,<br>107 | 3 |
| 137 | 526.8 | 221 | 311.1642 | $C_{20}H_{23}O_3^+$   | -4.3 | Unknown                     | Unknown            | 293, 264, 175,<br>121 | 4 |
| 138 | 533.4 | 221 | 293.1765 | $C_{17}H_{25}O_4^-$   | -2.2 | Unknown terpene             | Terpene            | 236, 221              | 3 |
| 139 | 536.1 | 320 | 151.1121 | $C_{10}H_{15}O^+$     | -2.1 | Unknown monoterpene         | Terpene            | 133, 123              | 3 |
| 140 | 566.9 | 221 | 302.3049 | $C_{18}H_{40}NO_2^+$  | 1.5  | Amino-octadecanediol        | Sphingolipid       | 284                   | 3 |
| 141 | 586.2 | 221 | 313.2383 | $C_{18}H_{33}O_4^-$   | 0.3  | Dihydroxy-octadecenoic acid | Hydroxy fatty acid | 293, 223, 201,<br>183 | 3 |
| 142 | 592.9 | 222 | 295.1896 | $C_{17}H_{27}O_4^-$   | 6.3  | Unknown terpene             | Terpene            | 251                   | 3 |
| 143 | 594.6 | 222 | 313.2384 | $C_{18}H_{33}O_4^-$   | -1.9 | Octadecanedioic acid        | Fatty acid         | 201                   | 3 |
| 144 | 633.9 | 222 | 285.2065 | $C_{16}H_{29}O_4^-$   | 2.3  | Dihydroxy-hexadecenoic acid | Hydroxy fatty acid | 267,223               | 3 |
| 145 | 640.2 | 222 | 564.3269 | $C_{27}H_{51}O_9NP^-$ | -5.7 | Sphingolipid conjugate I    | Sphingolipid       | 279                   | 3 |
| 146 | 658.4 | 222 | 297.1535 | $C_{16}H_{26}O_3S$    | 6.7  | Unknown                     | Unknown            | 265                   | 4 |
| 147 | 663.3 | 223 | 540.3273 | $C_{25}H_{51}O_9NP^-$ | 4.7  | Sphingolipid conjugate II   | Sphingolipid       | 255                   | 3 |
| 148 | 671.8 | 222 | 595.2936 | $C_{41}H_{39}O_4^-$   | 5.9  | Unknown                     | Unknown            | 315, 279, 241,<br>152 | 4 |

|     |       |     |          |                       |      |                                    |                    |               |   |
|-----|-------|-----|----------|-----------------------|------|------------------------------------|--------------------|---------------|---|
| 149 | 674.1 | 223 | 315.254  | $C_{18}H_{35}O_4^-$   | 0.4  | Dihydroxy-octadecanoic acid        | Hydroxy fatty acid | 297,269, 253  | 3 |
| 150 | 675.2 | 222 | 595.2877 | $C_{34}H_{43}O_9^-$   | 6    | Unknown                            | Unknown            | 279, 241, 152 | 4 |
| 151 | 683.2 | 223 | 295.2277 | $C_{18}H_{31}O_3^-$   | 0.6  | Hydroxy-octadecadienoic acid       | Hydroxy fatty acid | 277, 195, 183 | 3 |
| 152 | 683.5 | 223 | 243.1954 | $C_{14}H_{27}O_3^-$   | 4.7  | Hydroxy-tetradecanoic acid         | Hydroxy fatty acid | -----         | 3 |
| 153 | 690.2 | 221 | 235.1681 | $C_{15}H_{23}O_2^+$   | 4.9  | Unknown terpene                    | Terpene            | ----          | 3 |
| 154 | 701.6 | 223 | 566.3459 | $C_{27}H_{53}O_9NP^-$ | 4.9  | Sphingolipid conjugate III         | Sphingolipid       | 281(-285)     | 3 |
| 155 | 711.2 | nd  | 293.2112 | $C_{18}H_{29}O_3^-$   | 3.5  | Hydroxy-linolenic acid             | Hydroxy fatty acid | 275, 195, 179 | 3 |
| 156 | 733.7 | 223 | 311.1703 | $C_{13}H_{27}O_8^-$   | 4.1  | Unknown                            | Unknown            | 205           | 4 |
| 157 | 788.4 | 223 | 325.1829 | $C_{21}H_{25}O_3^-$   | -6.1 | Di-furanyl-dimethyl-undecatrien-ol | Furan              | 183           | 3 |
| 158 | 794.2 | nd  | 297.2459 | $C_{18}H_{33}O_3^-$   | -7.9 | Hydroxy-octadecenoic acid          | Hydroxy fatty acid | 279, 251, 171 | 3 |
| 159 | 814   | nd  | 271.2273 | $C_{16}H_{31}O_3^-$   | 2.2  | Hydroxy-palmitic acid              | Hydroxy fatty acid | 253, 225      | 3 |
| 160 | 827   | 224 | 227.2008 | $C_{14}H_{27}O_2^-$   | 3.7  | Myristic acid                      | Fatty acid         | ----          | 1 |
| 161 | 827.5 | nd  | 277.2184 | $C_{18}H_{29}O_2^-$   | -3.9 | Linolenic acid                     | Fatty acid         | 259, 233      | 2 |

|     |       |     |          |                     |      |                                 |                      |                    |     |
|-----|-------|-----|----------|---------------------|------|---------------------------------|----------------------|--------------------|-----|
| 162 | 836.4 | 223 | 415.226  | $C_{28}H_{31}O_3^-$ | 4.6  | Hydroxy-octacosadodecenoic acid | Hydroxy fatty acid   | 279                | 3   |
| 163 | 847.6 | 223 | 455.3522 | $C_{30}H_{47}O_3^-$ | 1.9  | Unknown steroid                 | Steroid              | 378, 339, 253      | 3-4 |
| 164 | 849.9 | 223 | 439.3551 | $C_{30}H_{47}O_2^+$ | 4.6  | Unknown steroid                 | Steroid              | 393, 203, 189      | 3   |
| 165 | 860.2 | 224 | 253.2166 | $C_{16}H_{29}O_2^-$ | 2.8  | Palmitoleic acid                | Fatty acid           | ---                | 2   |
| 166 | 860.5 | 223 | 282.2767 | $C_{18}H_{36}NO^+$  | 8.8  | Oleamide                        | Nitrogenous compound | 265, 247           | 2   |
| 167 | 870.2 | 224 | 343.2826 | $C_{20}H_{39}O_4^-$ | 8.2  | Dihydroxy-arachidic acid        | Hydroxy fatty acid   | ---                | 3   |
| 168 | 874.7 | 224 | 241.2158 | $C_{15}H_{29}O_2^-$ | 6    | Pentadecanoic acid              | Fatty acid           | ----               | 2   |
| 169 | 878.3 | 224 | 279.2322 | $C_{18}H_{31}O_2^-$ | 2.8  | Linoleic acid                   | Fatty acid           | 255                | 1   |
| 170 | 887.9 | 224 | 369.3002 | $C_{22}H_{41}O_4^-$ | 2.3  | Docosanedioic acid              | Fatty acid           | 351, 307           | 2   |
| 171 | 909.4 | 224 | 453.3354 | $C_{30}H_{45}O_3^-$ | 4.5  | Unknown steroid                 | Steroid              | 380, 281, 227, 116 | 3-4 |
| 172 | 909.5 | 224 | 299.2579 | $C_{18}H_{35}O_3^-$ | 4.1  | Hydroxy-stearic acid            | Hydroxy fatty acid   | -----              | 3   |
| 173 | 919.7 | 224 | 327.2886 | $C_{20}H_{39}O_3^-$ | 5.7  | Hydroxy-arachidic acid          | Hydroxy fatty acid   | -----              | 3   |
| 174 | 920.6 | 224 | 255.2331 | $C_{16}H_{31}O_2^-$ | -0.6 | Palmitic acid                   | Fatty acid           | -----              | 1   |
| 175 | 941.7 | nd  | 281.2496 | $C_{18}H_{33}O_2^-$ | -3.4 | Oleic acid                      | Fatty acid           | -----              | 2   |

|     |        |     |          |                     |      |                               |                      |          |   |
|-----|--------|-----|----------|---------------------|------|-------------------------------|----------------------|----------|---|
| 176 | 949.3  | 224 | 284.293  | $C_{18}H_{38}NO^+$  | 6.2  | Stearamide                    | Nitrogenous compound | ----     | 3 |
| 177 | 962    | 224 | 269.2481 | $C_{17}H_{33}O_2^-$ | 1.8  | Heptadecanoic acid            | Fatty acid           | -----    | 2 |
| 178 | 980.6  | 224 | 310.3104 | $C_{20}H_{40}NO^+$  | -2.7 | Eicosenamide                  | Nitrogenous compound | ----     | 3 |
| 179 | 990    | 224 | 327.2885 | $C_{20}H_{39}O_3^-$ | 5.9  | Hydroxy-arachidic acid isomer | Hydroxy fatty acid   | ----     | 3 |
| 180 | 993.3  | 224 | 326.3424 | $C_{21}H_{44}NO^+$  | -2   | Henicosanamide                | Nitrogenous compound | 256      | 2 |
| 181 | 998    | 224 | 283.2645 | $C_{18}H_{35}O_2^-$ | -0.8 | Stearic acid                  | Fatty acid           | ----     | 1 |
| 182 | 1011.8 | 224 | 309.2789 | $C_{20}H_{37}O_2^-$ | 3.4  | Eicosenoic acid               | Fatty acid           | -----    | 2 |
| 183 | 1024.6 | 225 | 341.3046 | $C_{21}H_{41}O_3^-$ | 4.3  | Hydroxy-heneicosanoic acid    | Hydroxy fatty acid   | 295, 183 | 3 |
| 184 | 1029.4 | 225 | 312.3245 | $C_{20}H_{42}NO^+$  | 5.2  | Eicosanamide isomer           | Nitrogenous compound | ----     | 3 |
| 185 | 1057.3 | 225 | 355.3191 | $C_{22}H_{43}O_3^-$ | 7.5  | Hydroxy-docosanoate           | Hydroxy fatty acid   | 248, 182 | 3 |
| 186 | 1065.6 | 225 | 311.295  | $C_{20}H_{39}O_2^-$ | 1.8  | Arachidic acid                | Fatty acid           | -----    | 1 |

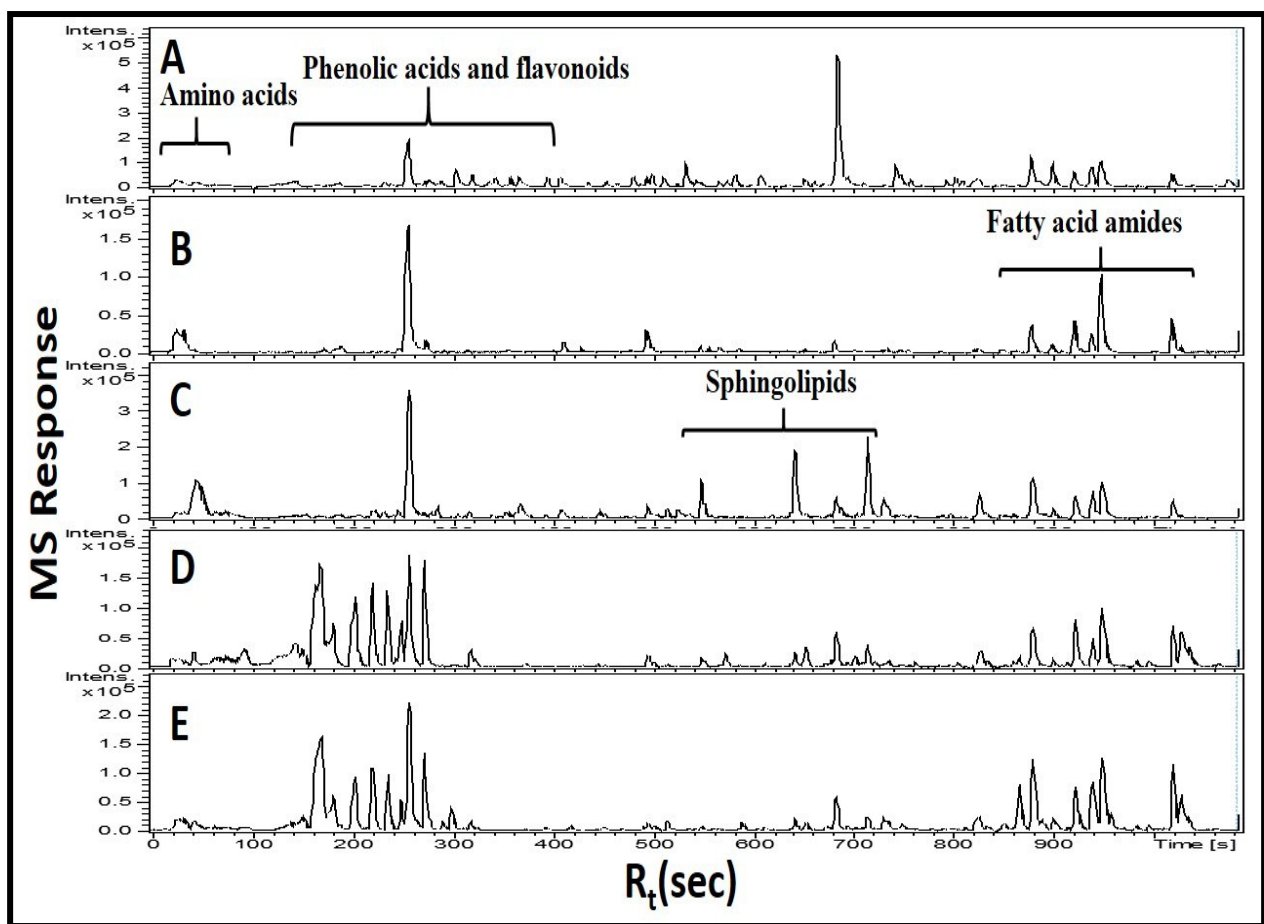

**Fig.S1** Representative UHPLC–MS traces analyzed in the positive ion mode of unroasted methanolic extracts of Cumin (A), Fennel (B), Anise (C), Coriander (D) and Caraway (E), characterized by 2 main regions: (150–400 s) with peaks mainly due to amino acids, phenolic acids and flavonoids and a region (550–1000 s) assigned for sphingolipids and fatty acid amides.

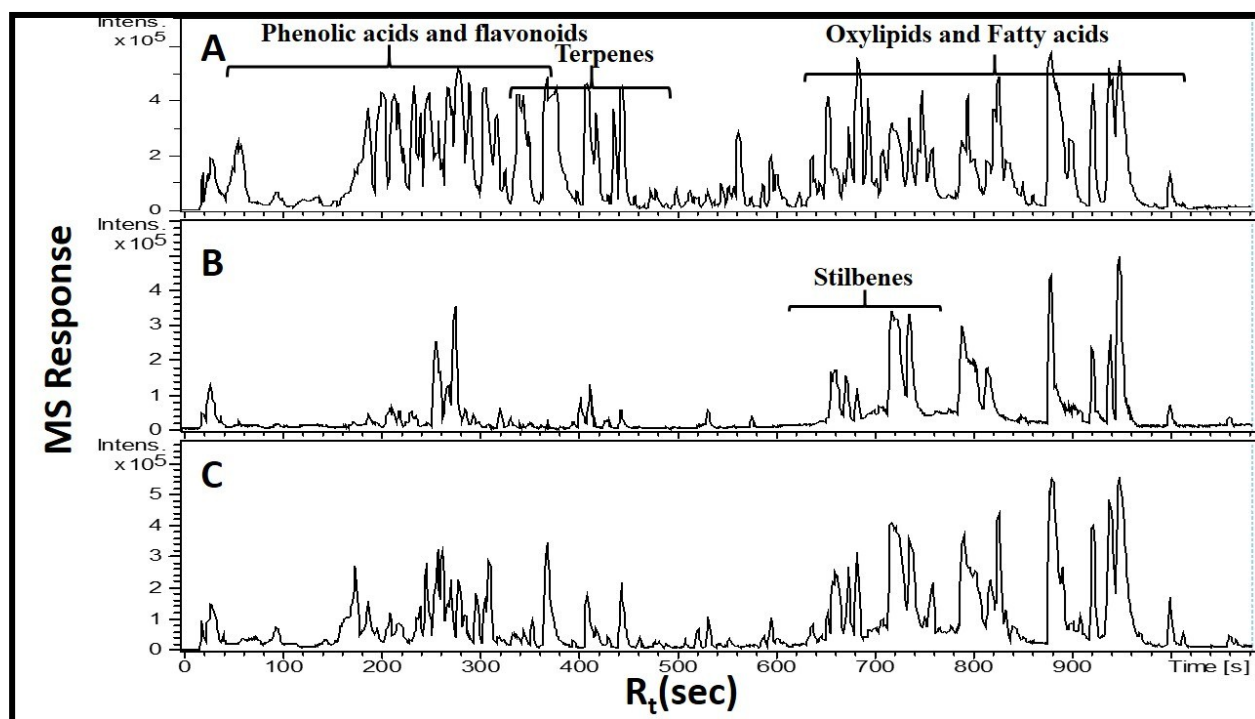

**Fig. S2** Representative UHPLC–MS traces analyzed in the negative ion mode of roasted methanol extracts of cumin (A), fennel (B) and anise (C).

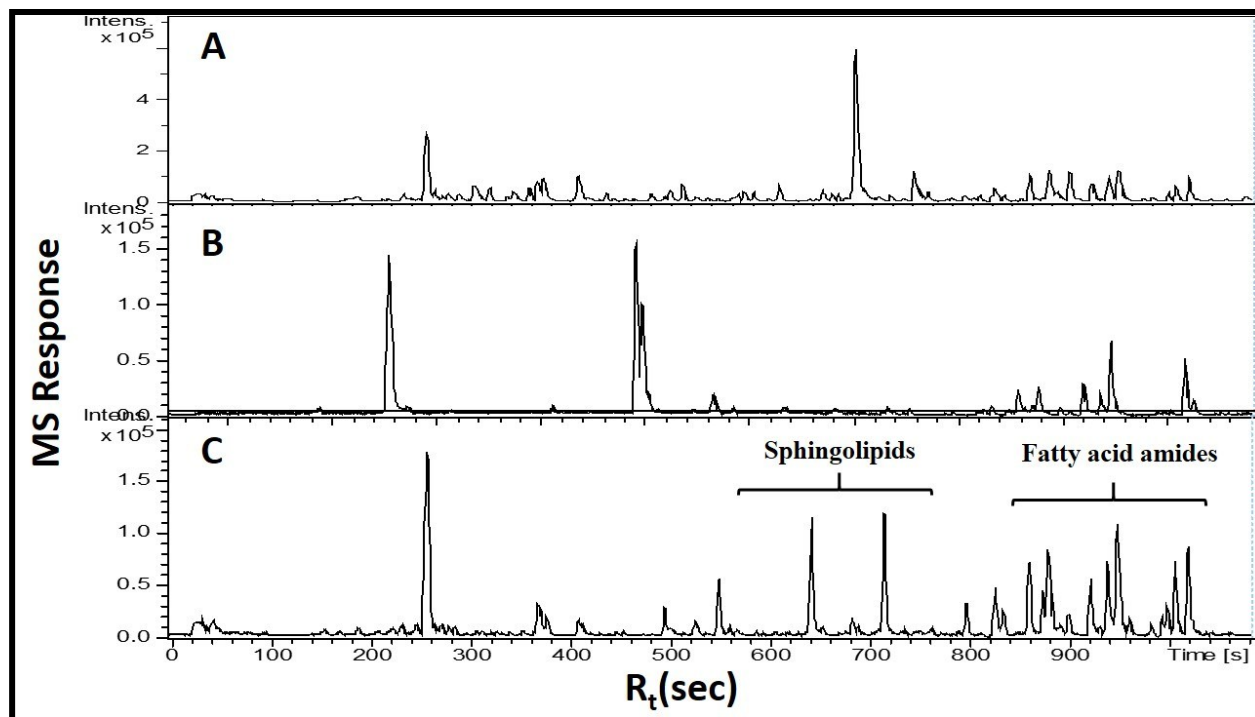

**Fig. S3** Representative UHPLC–MS traces analyzed in the positive ion mode of roasted methanol extracts of cumin (A), fennel (B) and anise (C).

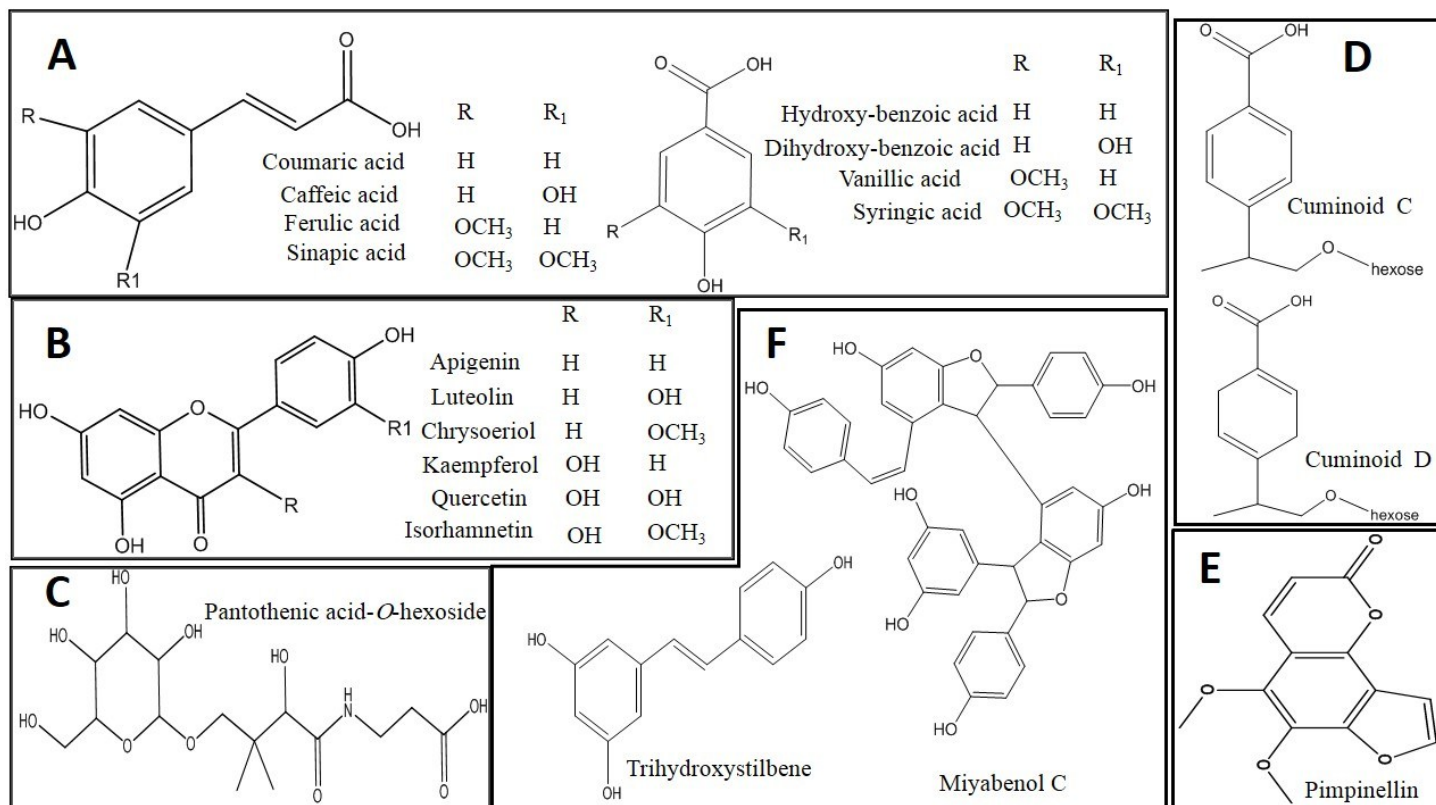

**Fig. S4.** Major classes of phytochemicals: phenolic acids (A), flavonoids (B), nitrogenous compounds (C), terpenes (D), coumarins (E) and stilbenes (F) detected in the studied umbelliferous fruits.



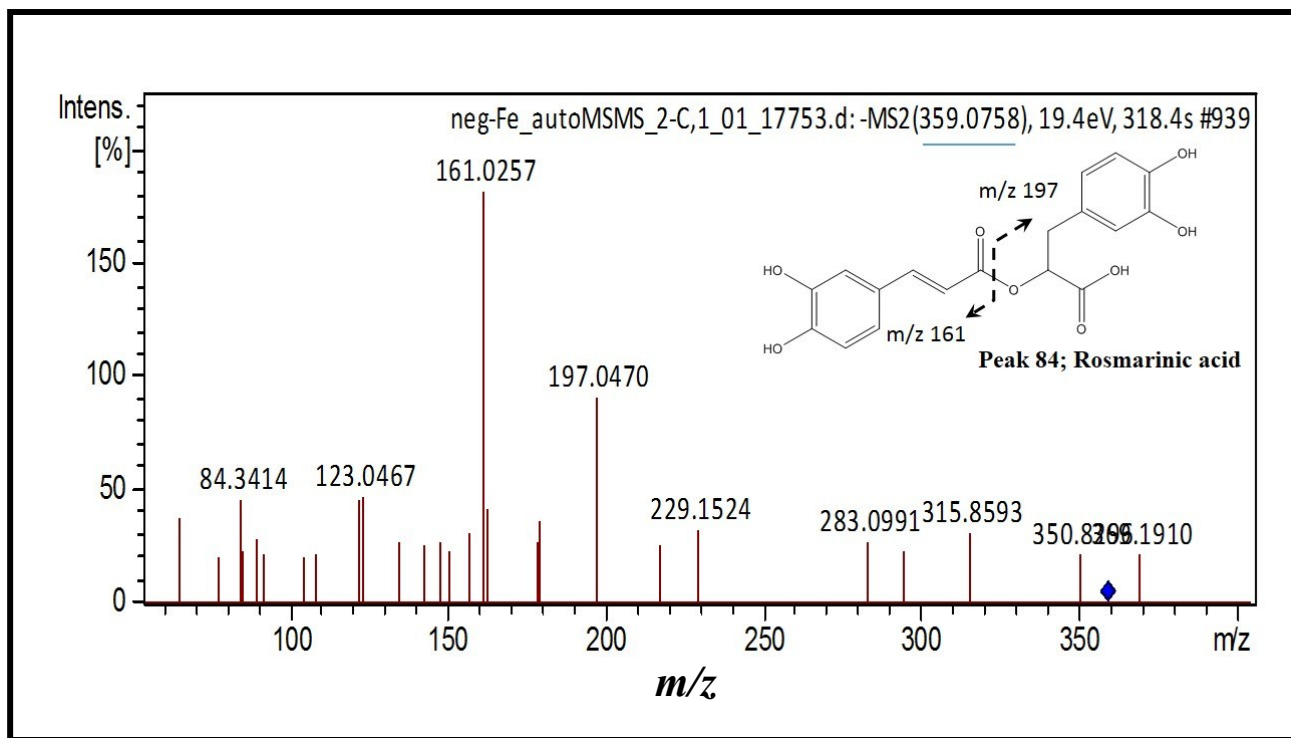

**Fig. S5a** ESI-MS/MS spectrum of rosmarinic acid (peak 84;  $C_{18}H_{15}O_8^-$ ) in the negative ion mode.

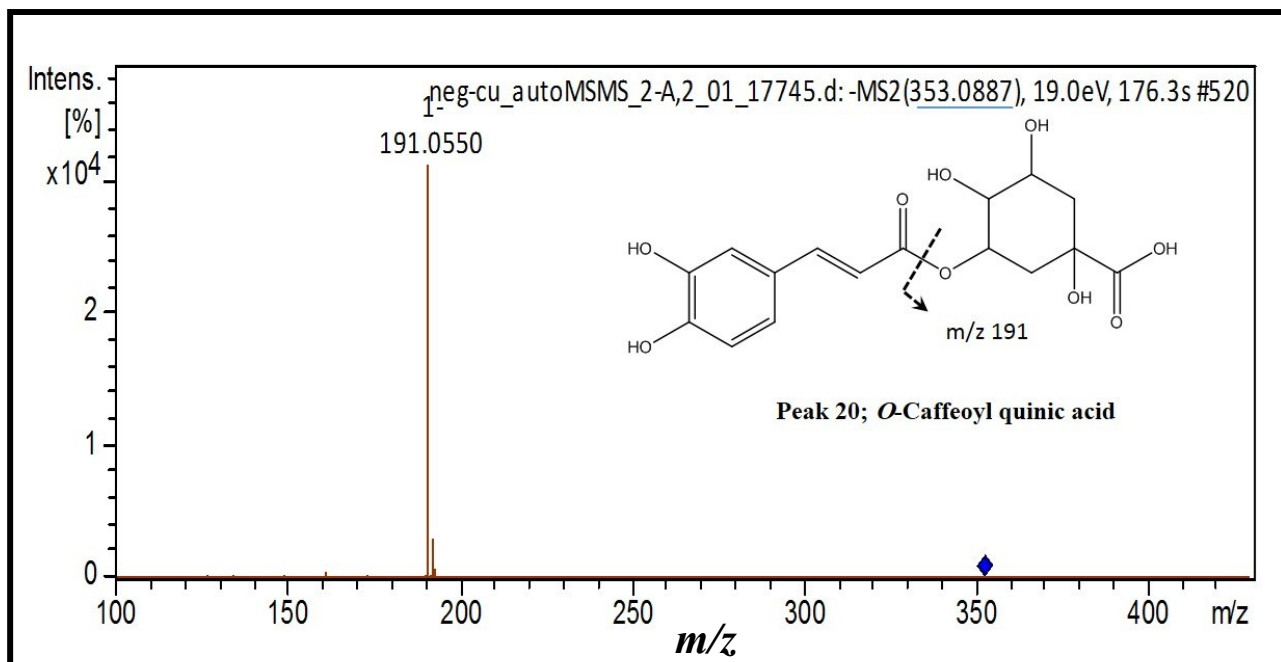

**Fig. S5b** ESI-MS/MS spectrum of *O*-caffeoyl quinic acid (peak 20;  $C_{16}H_{17}O_9^-$ ) in the negative ion mode.



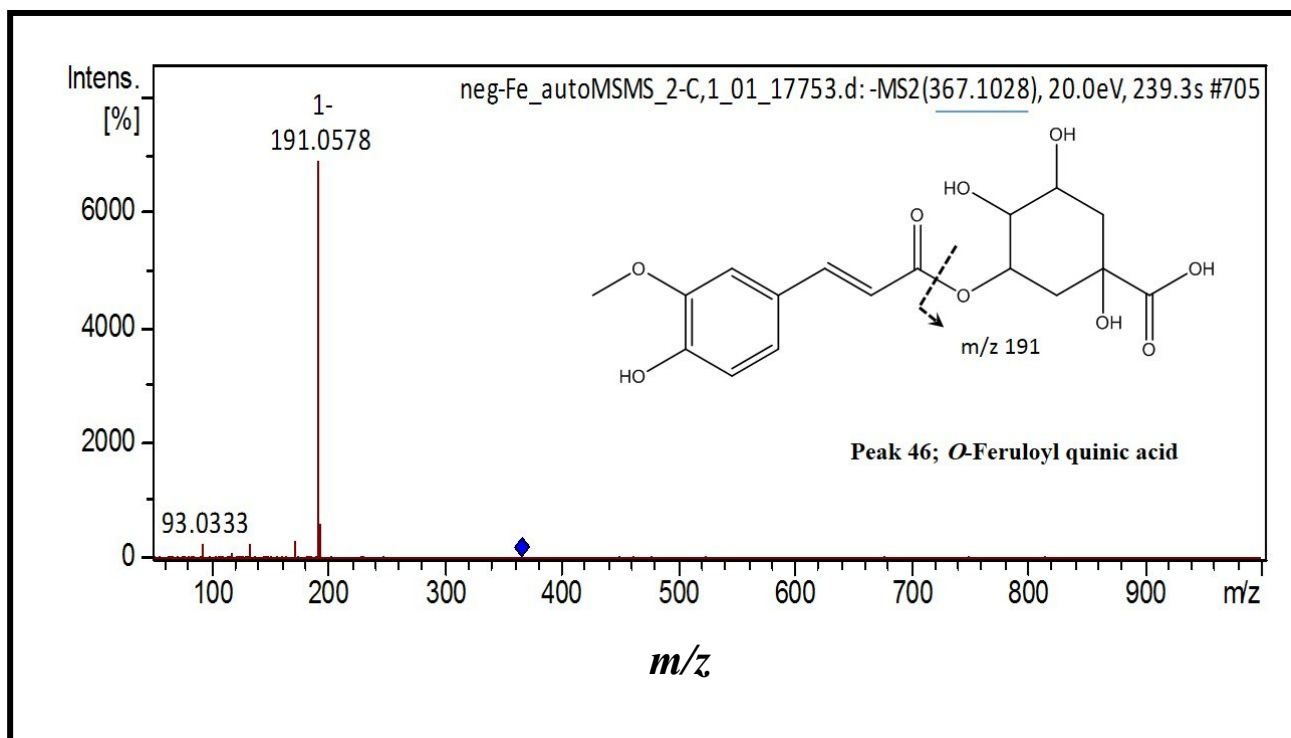

**Fig. S5d** ESI-MS/MS spectrum of *O*-feruloyl quinic acid (peak 46;  $C_{17}H_{19}O_9^-$ ) in the negative ion mode.

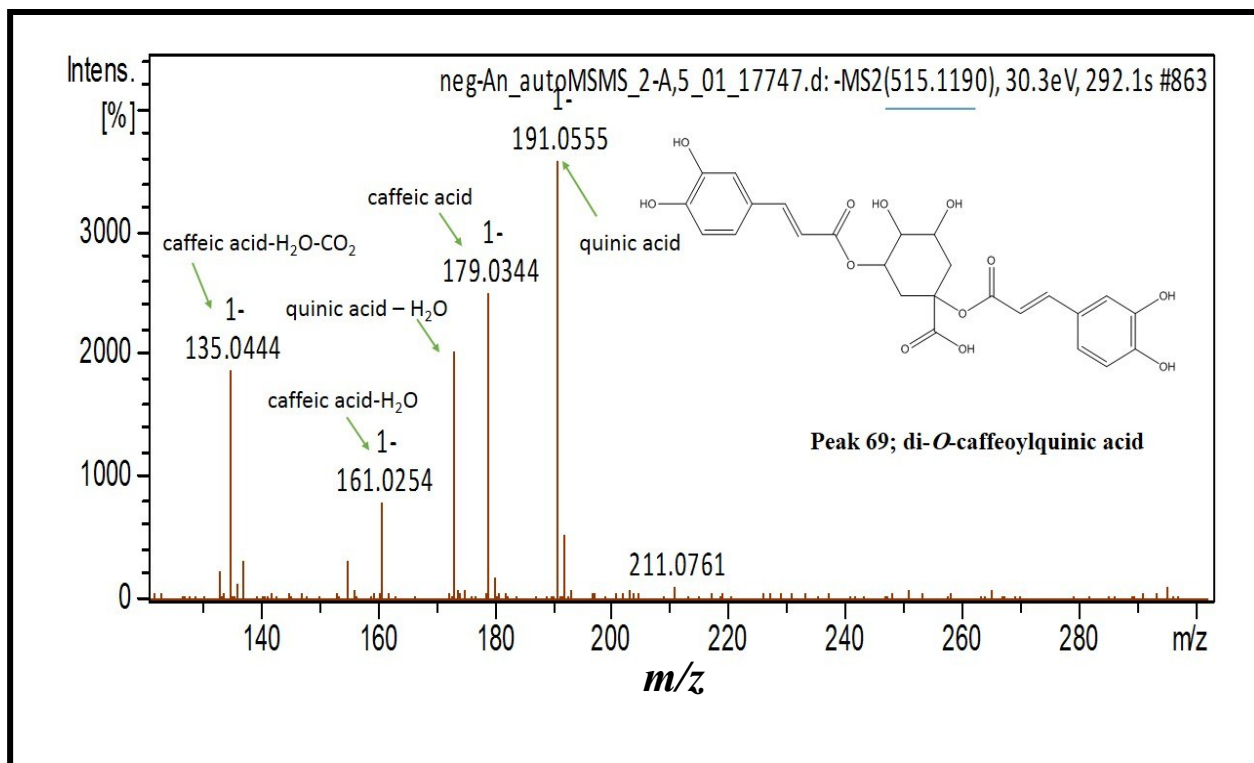

**Fig. S5e** ESI-MS/MS spectrum of di-*O*-caffeoylquinic acid (peak 69; C<sub>25</sub>H<sub>23</sub>O<sub>12</sub><sup>-</sup>) in the negative ion mode.

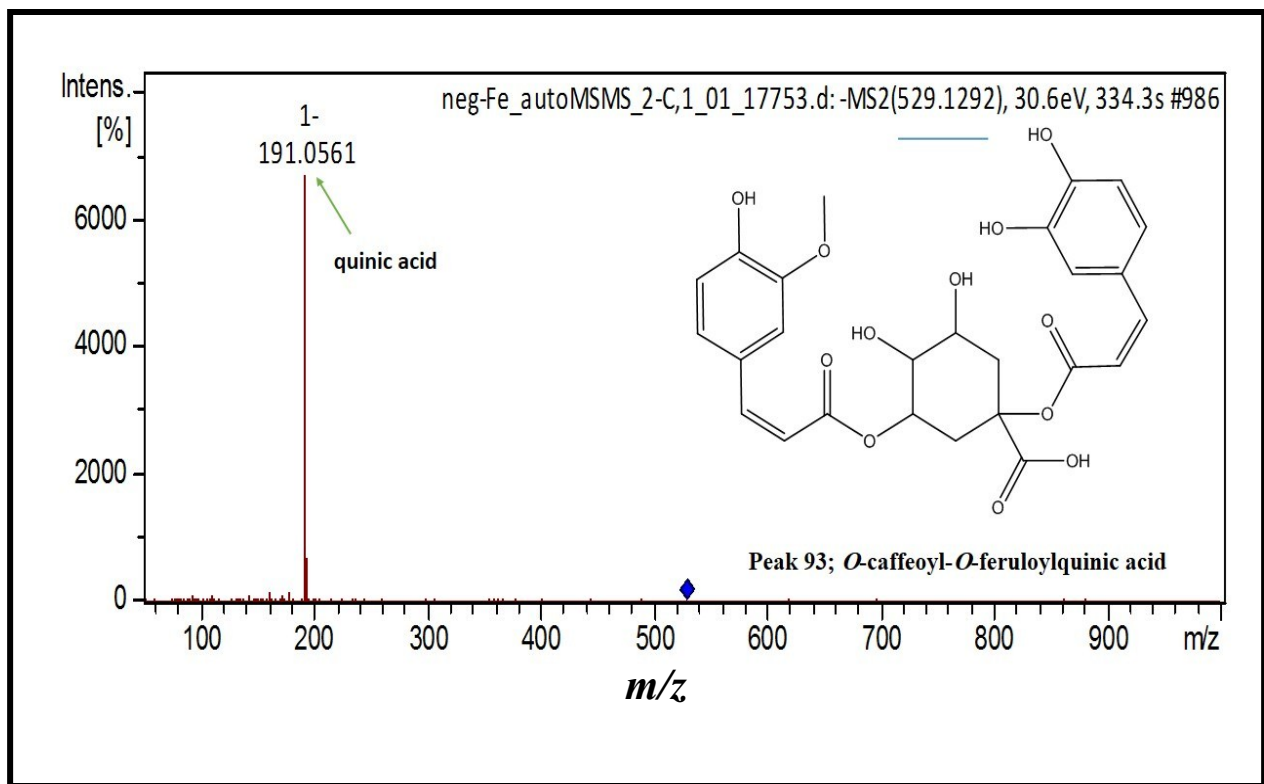

**Fig. S5f** ESI-MS/MS spectrum of *O*-caffeoyl-*O*-feruloylquinic acid (peak 93;  $C_{26}H_{25}O_{12}^-$ ) in the negative ion mode.

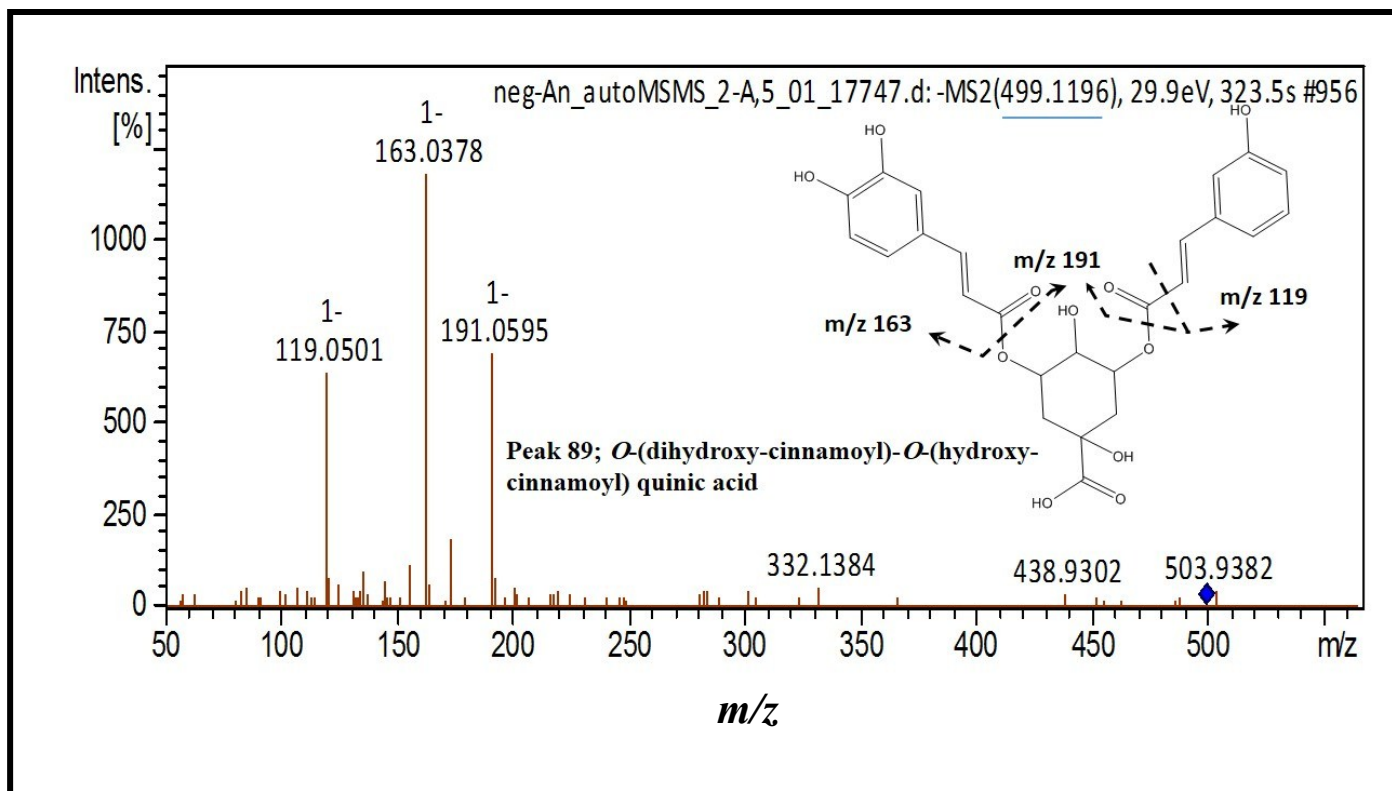

**Fig. S5g** ESI-MS/MS spectrum of *O*-(dihydroxy-cinnamoyl)-*O*-(hydroxy-cinnamoyl) quinic acid (peak 89;  $C_{25}H_{23}O_{11}^-$ ) in the negative ion mode.

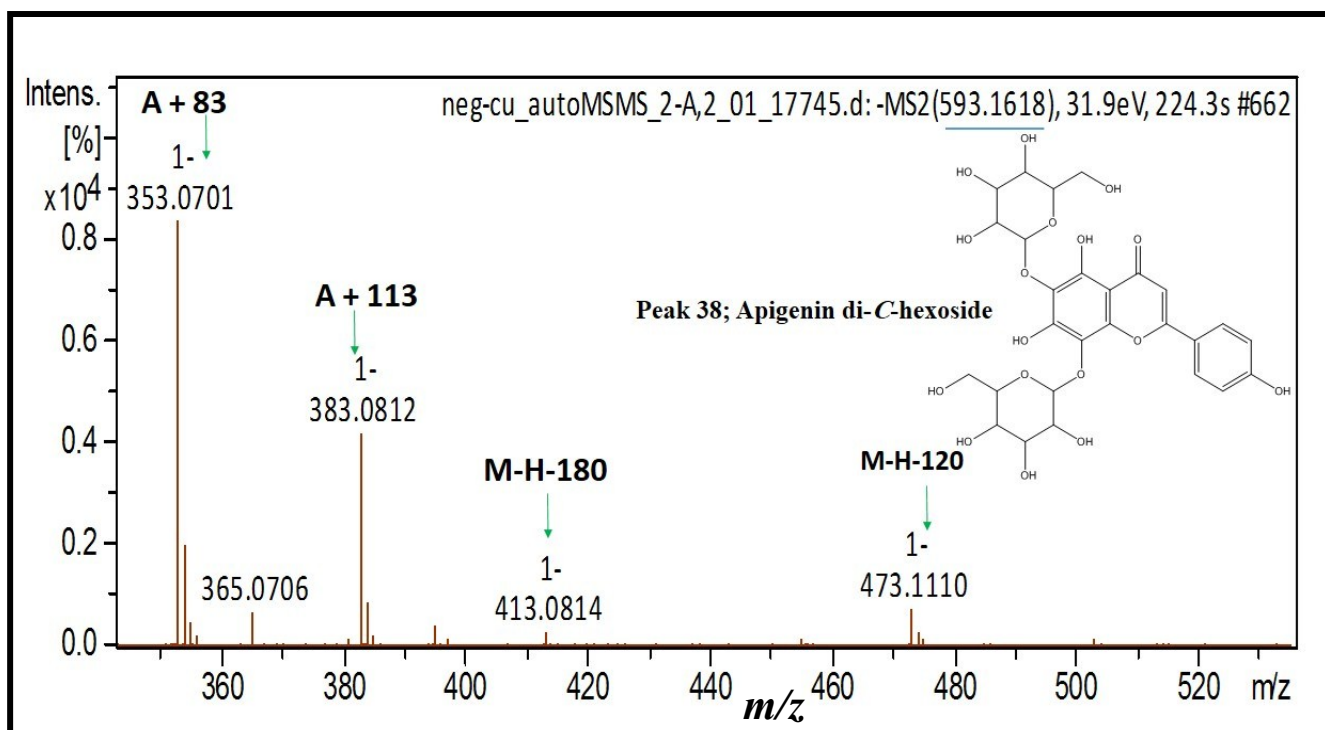

**Fig. S6a** ESI-MS/MS spectrum of apigenin di-C-hexoside (peak 38;  $C_{27}H_{29}O_{15}^-$ ) in the negative ion mode.



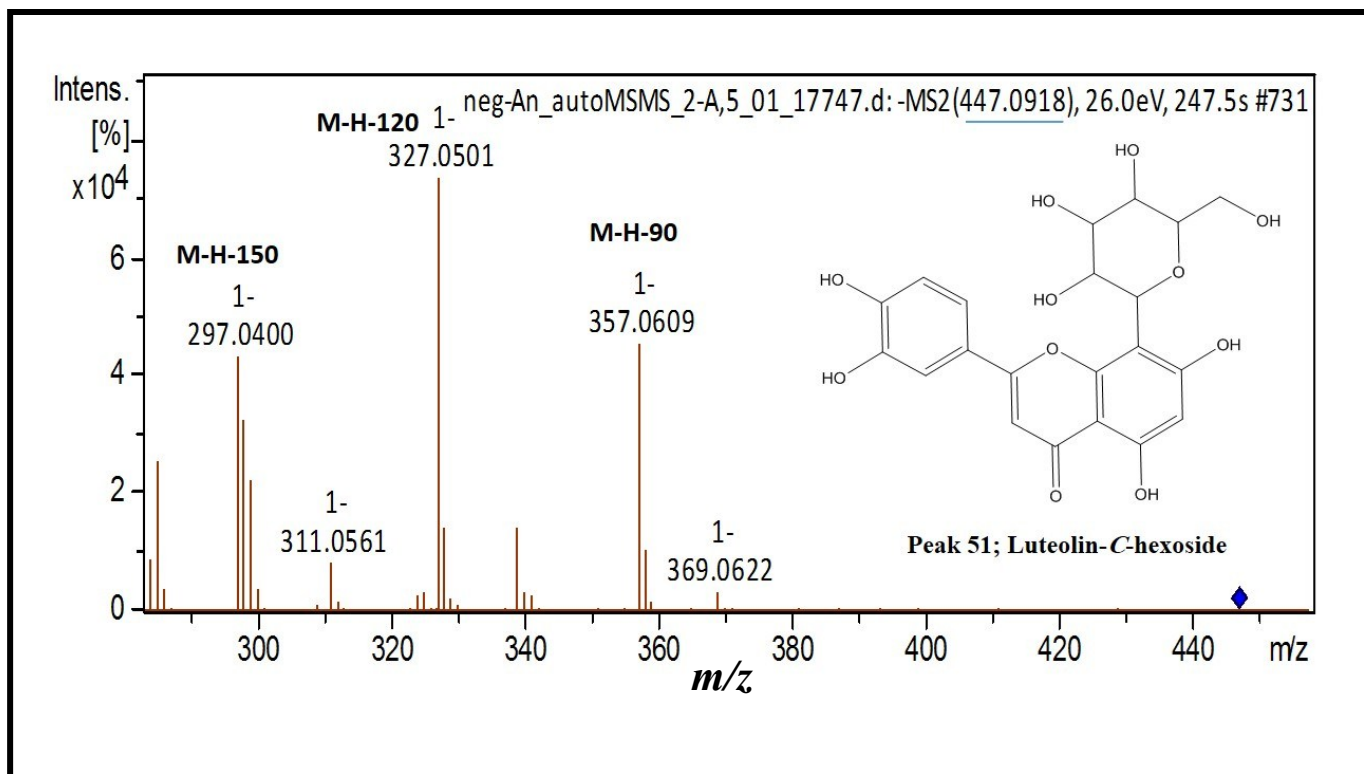

**Fig. S6b** ESI-MS/MS spectrum of luteolin-*C*-hexoside (peak 51; C<sub>21</sub>H<sub>19</sub>O<sub>11</sub><sup>-</sup>) in the negative ion mode.

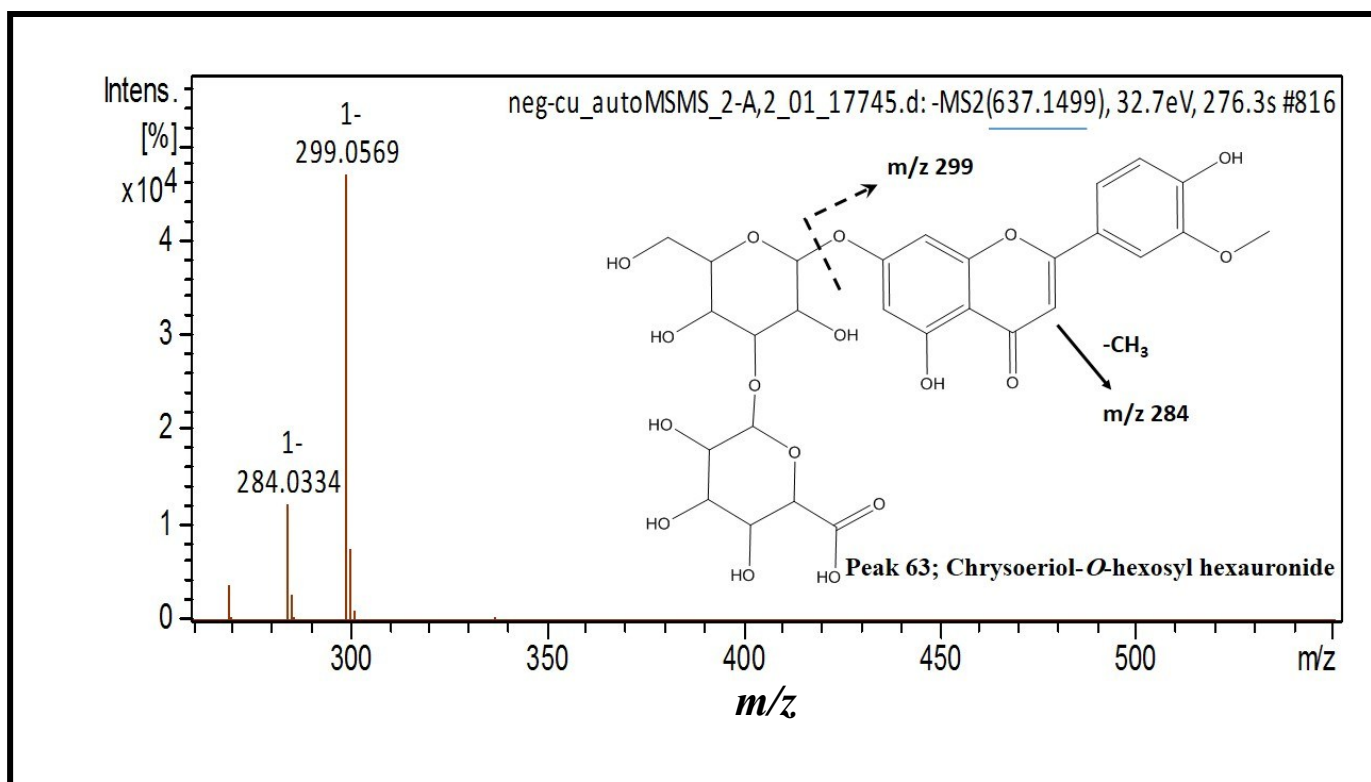

**Fig. S7a** ESI-MS/MS spectrum of chrysoeriol-*O*-hexosyl hexauronide (peak 63; C<sub>28</sub>H<sub>29</sub>O<sub>17</sub><sup>-</sup>) in the negative ion mode.

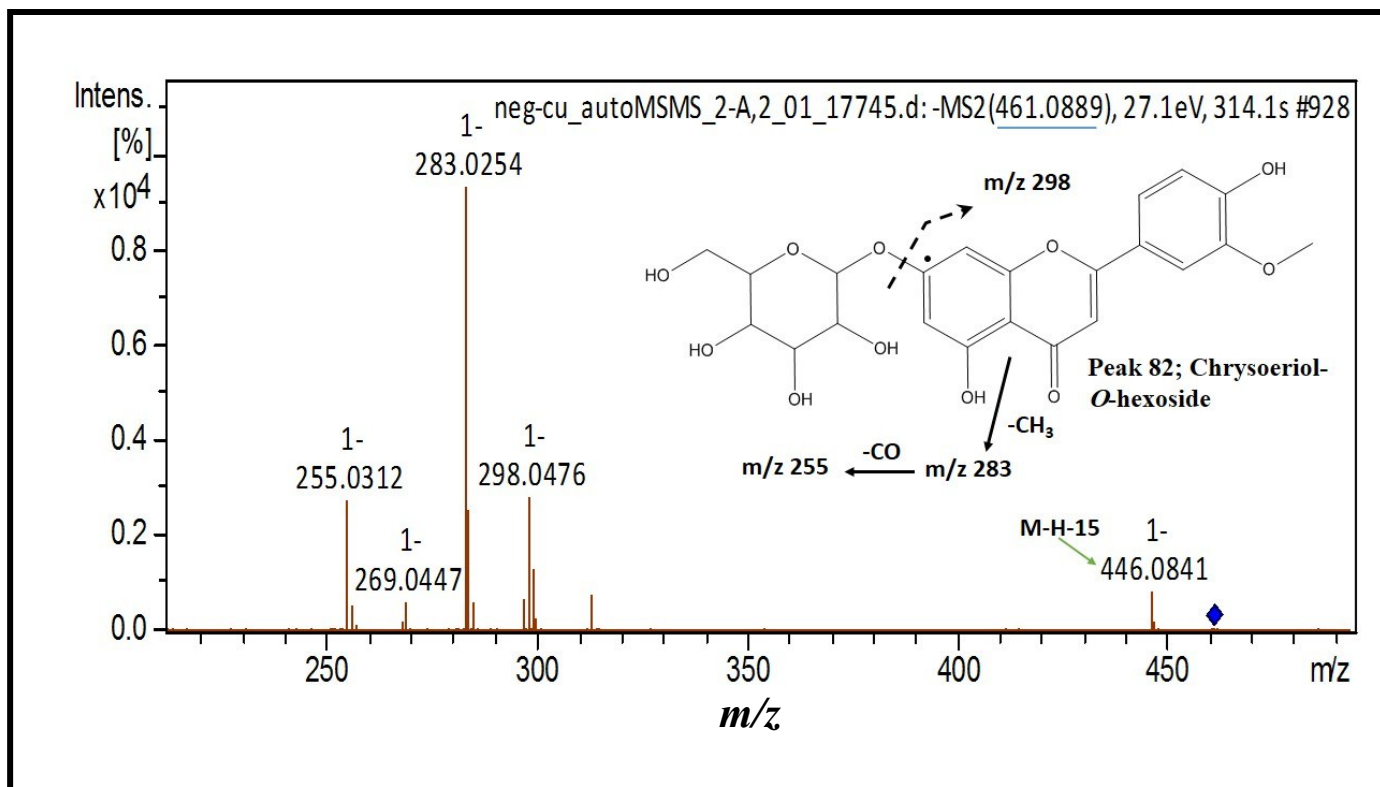

**Fig. S7b** ESI-MS/MS spectrum of chryseriol-*O*-hexoside (peak82; C<sub>22</sub>H<sub>21</sub>O<sub>11</sub><sup>-</sup>) in the negative ion mode.

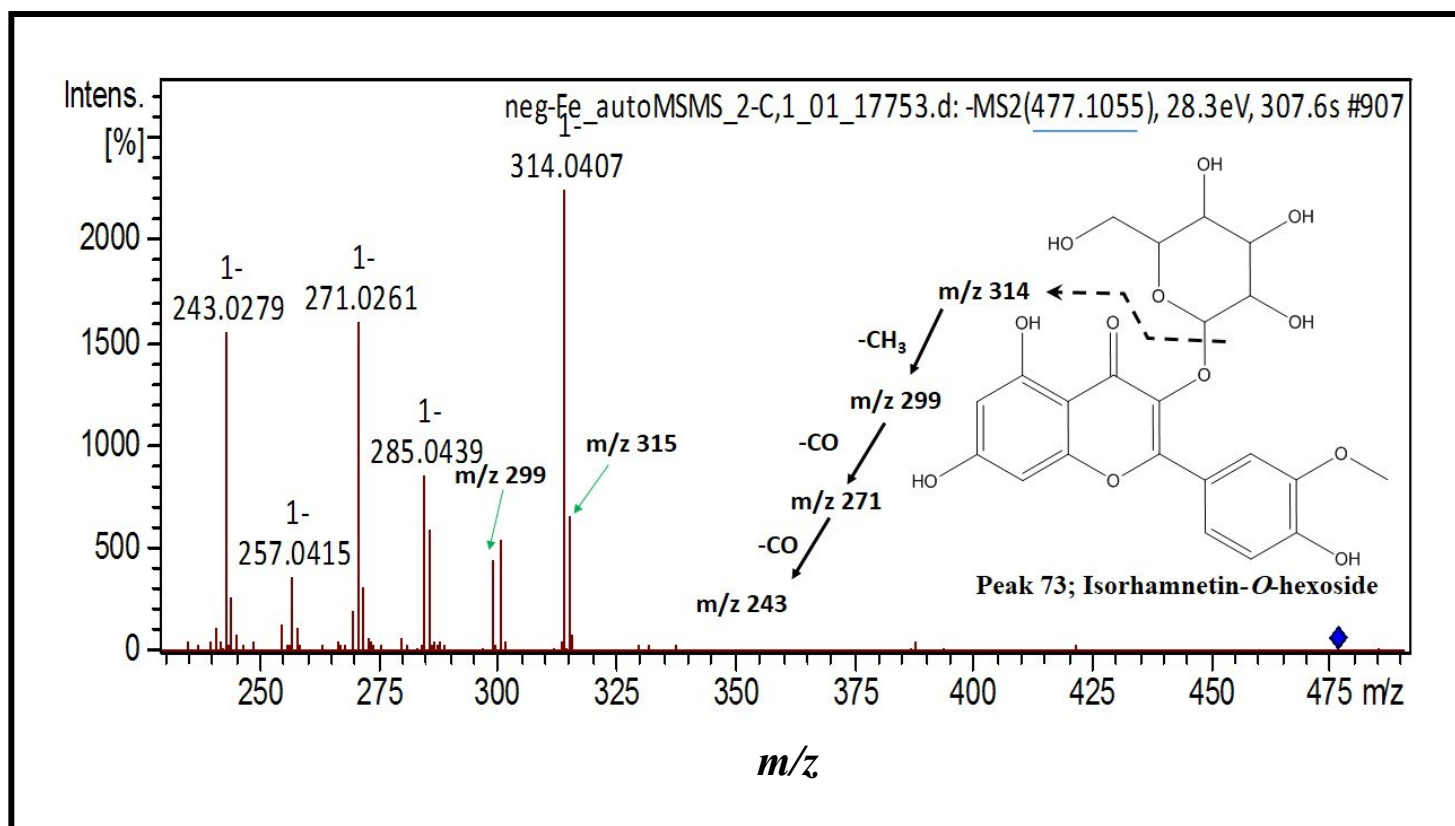

**Fig. S8a** ESI-MS/MS spectrum of isorhamnetin-*O*-hexoside (peak 73;  $C_{22}H_{21}O_{12}^-$ ) in the negative ion mode.

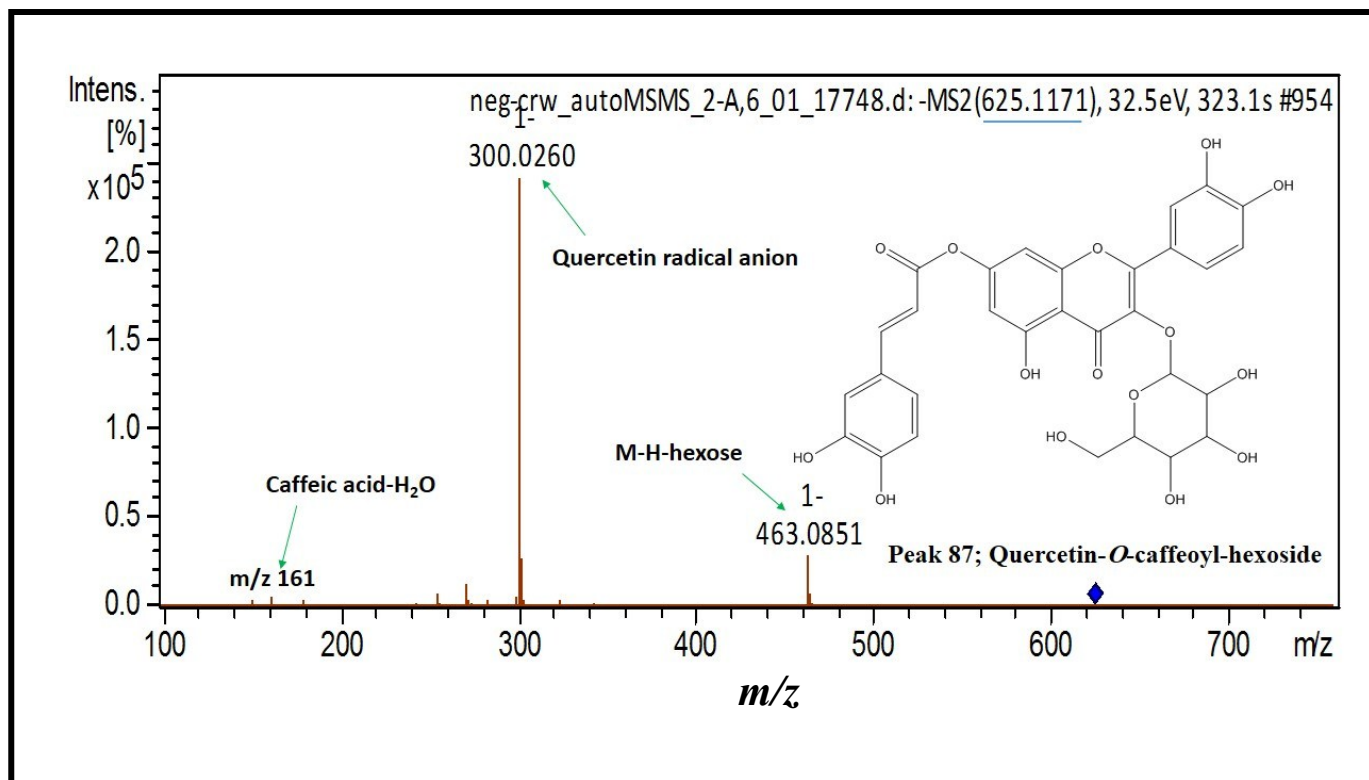

**Fig. S8b** ESI-MS/MS spectrum of quercetin-*O*-caffeoyl-hexoside (peak 87; C<sub>30</sub>H<sub>25</sub>O<sub>15</sub><sup>-</sup>) in the negative ion mode.

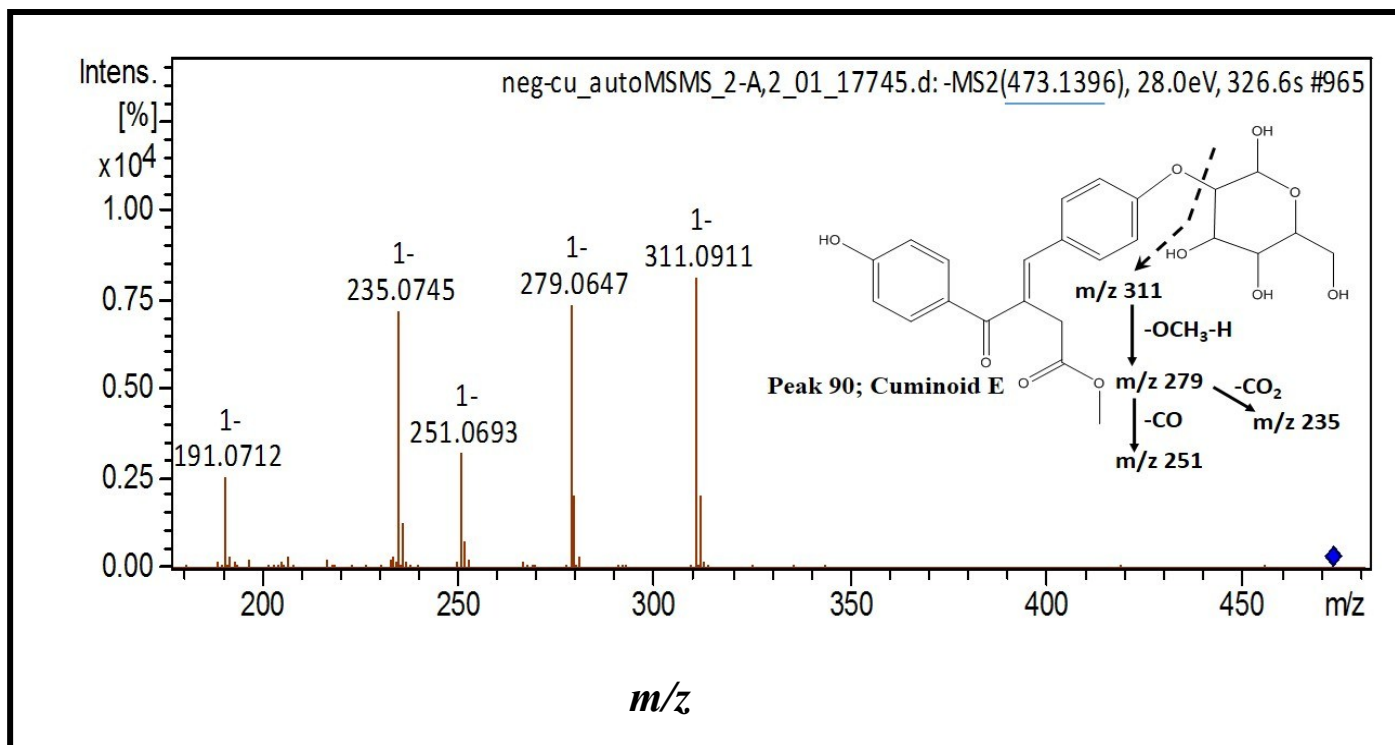

**Fig. S9** ESI-MS/MS spectrum of cuminoid E (peak 90;  $C_{24}H_{25}O_{10}^-$ ) in the negative ion mode.

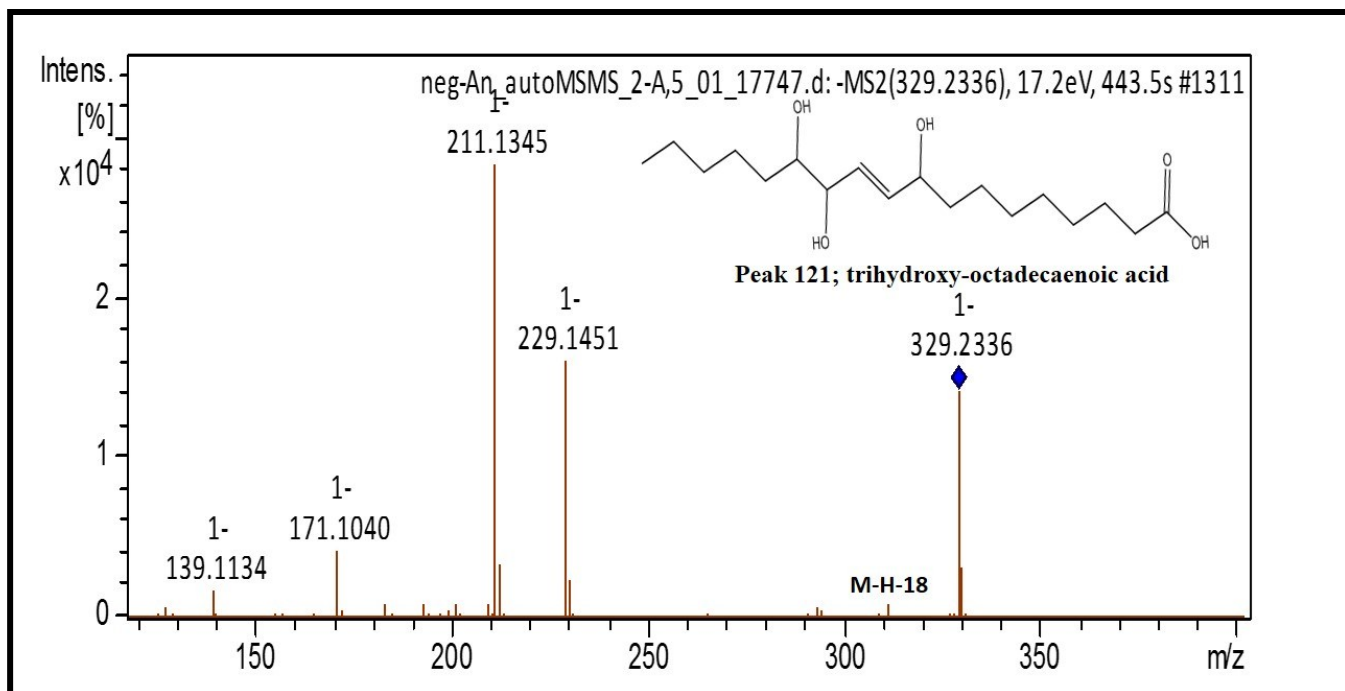

**Fig. S10** ESI-MS/MS spectrum of trihydroxy-octadecaenoic acid (peak 121;  $C_{18}H_{33}O_5^-$ ) in the negative ion mode.

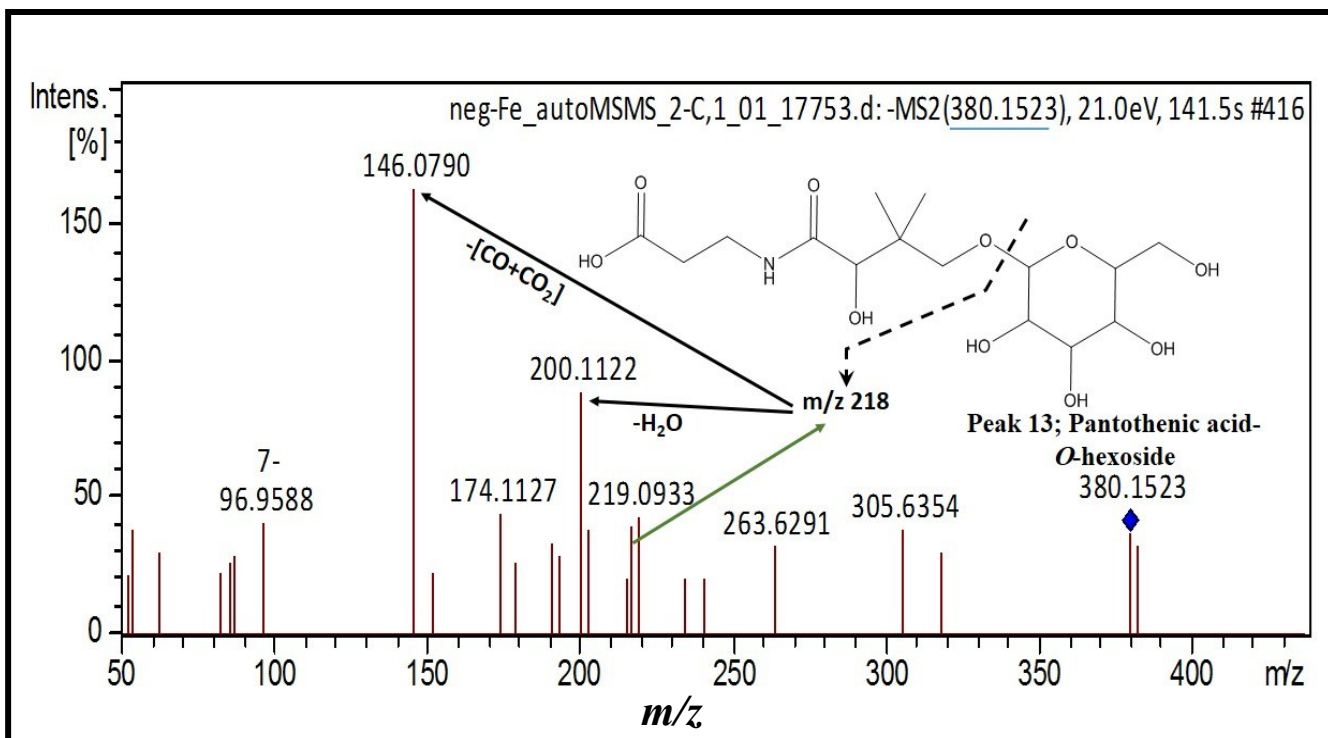

**Fig. S11** ESI-MS/MS spectrum of pantothenic acid-*O*-hexoside (peak 13;  $C_{15}H_{26}NO_{10}^-$ ) in the negative ion mode.



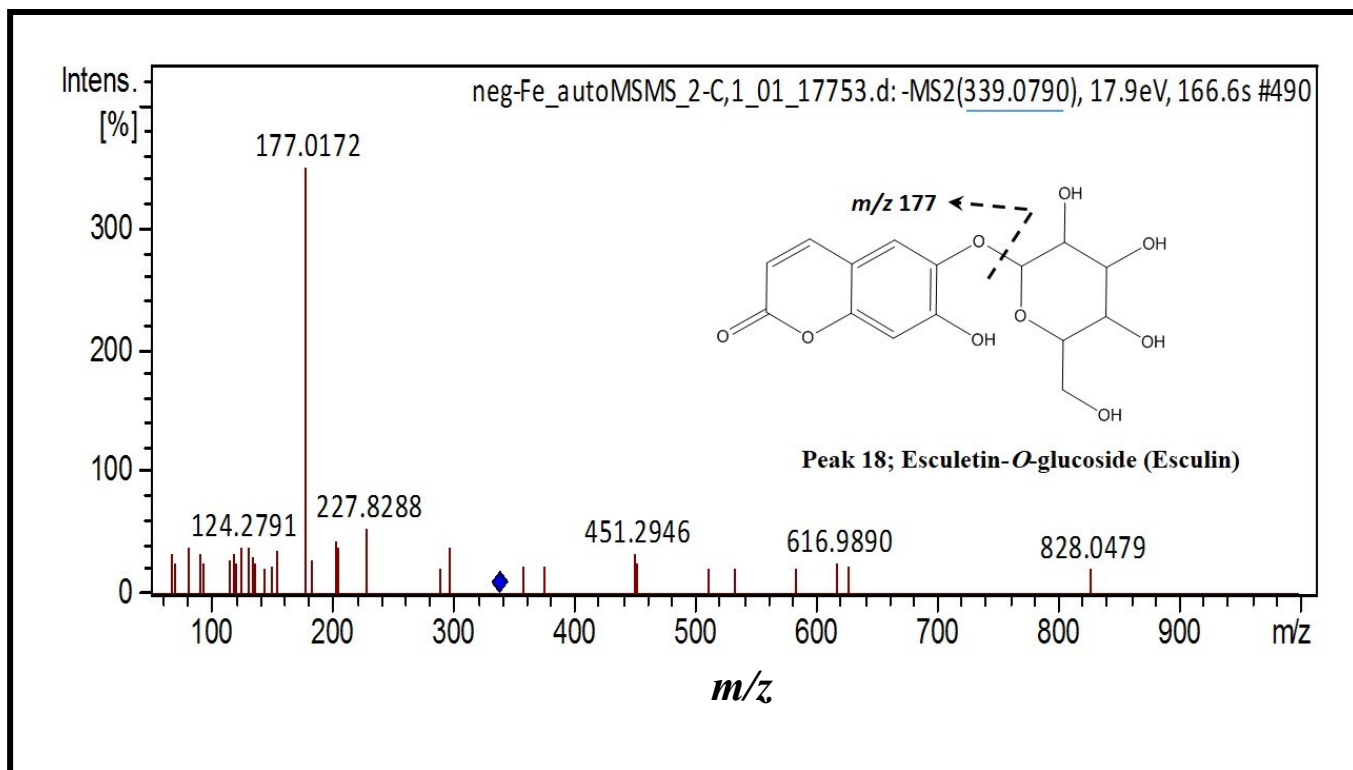

**Fig. S12** ESI-MS/MS spectrum of esculin (peak 18;  $C_{15}H_{15}O_9^-$ ) in the negative ion mode.

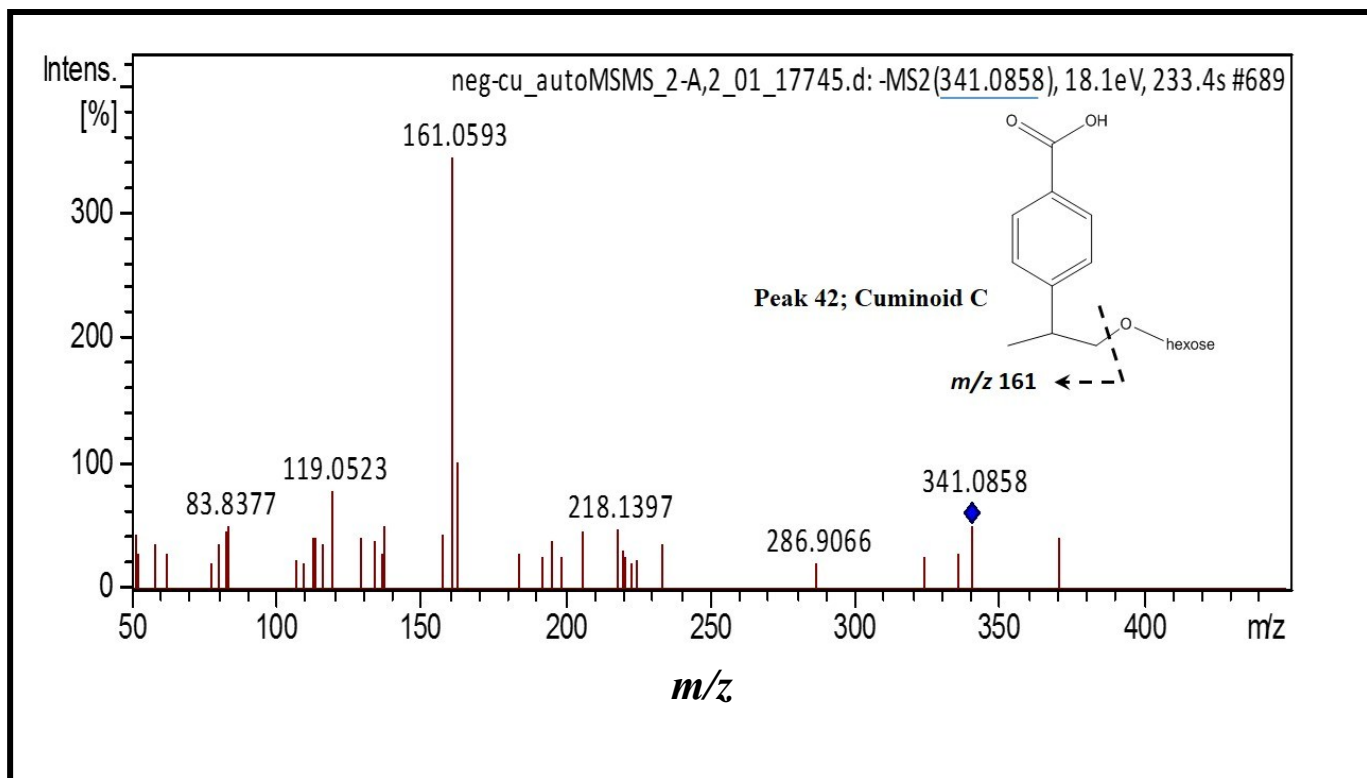

**Fig. S13a** ESI-MS/MS spectrum of cuminoid C (peak 42;  $C_{16}H_{21}O_8^-$ ) in the negative ion mode.

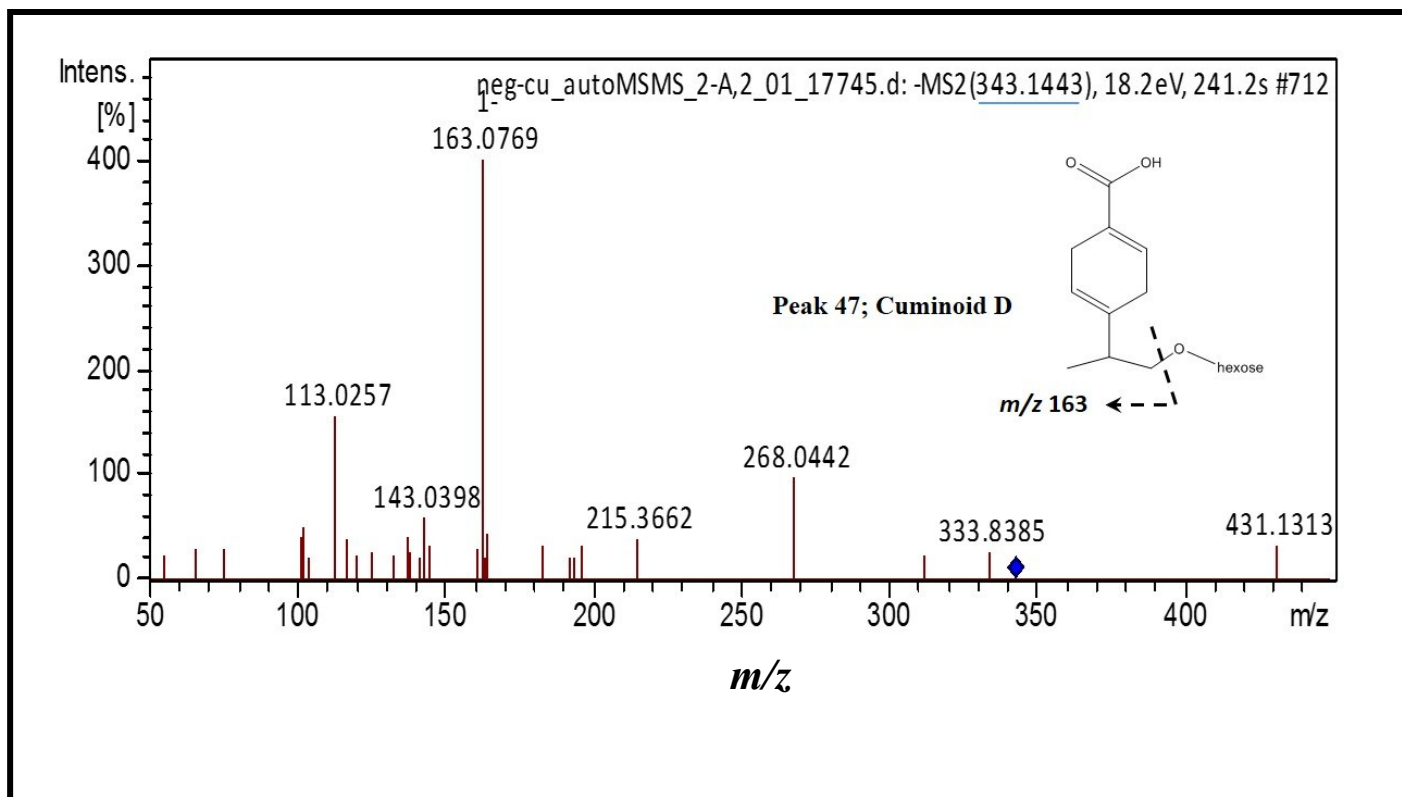

**Fig. S13b** ESI-MS/MS spectrum of cuminoid D (peak 47;  $C_{16}H_{23}O_8^-$ ) in the negative ion mode.

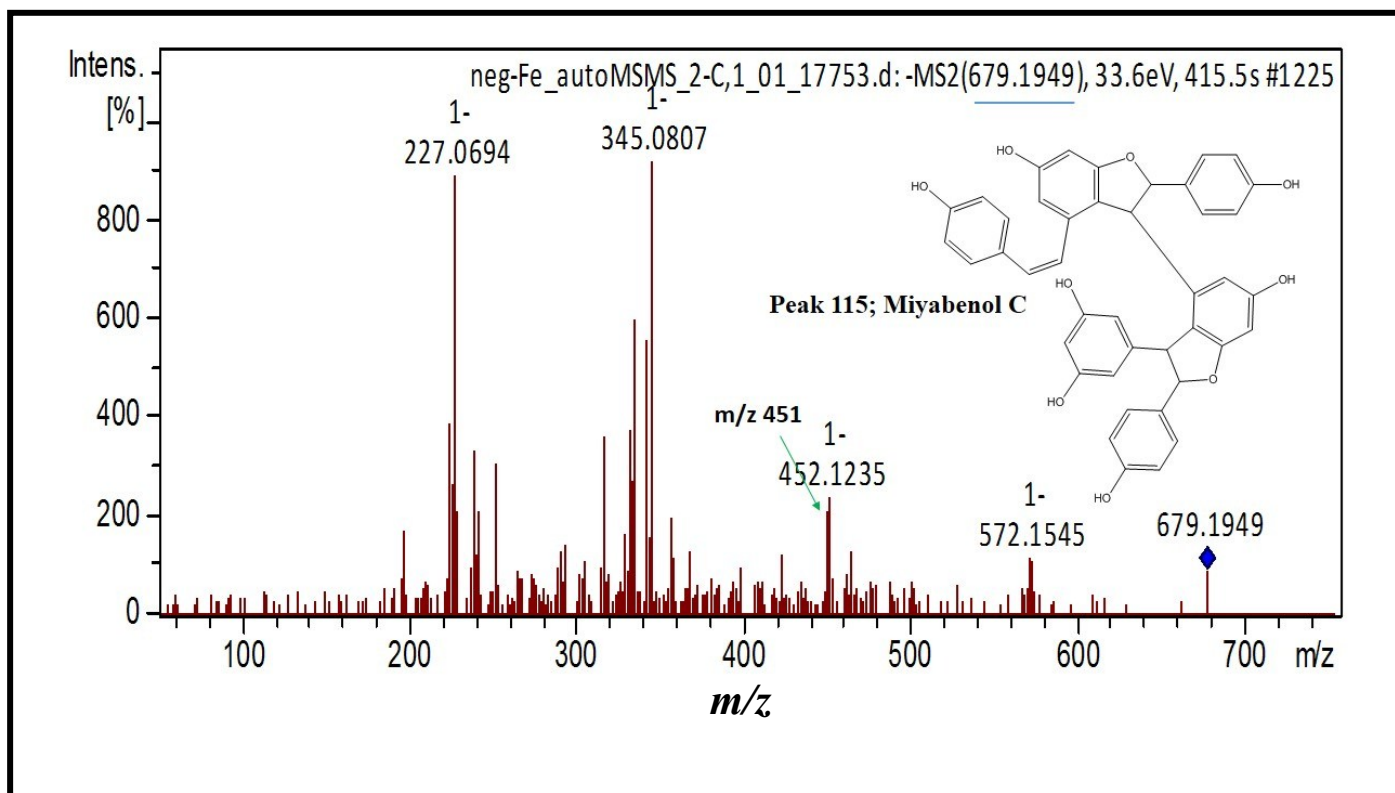

**Fig. S14** ESI-MS/MS spectrum of miyabenol C (peak 115;  $C_{42}H_{31}O_9$ )<sup>-</sup> in the negative ion mode.
